# Supplementary material for: Transition-metal-catalyzed one-pot selenylation of electrophilic arylating agents using triphenyltin chloride/Se as a phenylselenating agent
Source: Royal Society of Chemistry journal article supplement (doi:10.1039/d2ob00011c), 2022-01-01
Supplement: d2ob00011c1.pdf [file d2ob00011c1.pdf]

## Supporting Information

### Transition-metals-catalyzed one-pot selenylation of electrophilic arylating agents using triphenyltin chloride/Se as a phenylselenating agent

Zeinab Shirvandi<sup>a</sup> Bahareh Atashkar<sup>b</sup>, Mohammad Ali Zolfigol<sup>b\*</sup>, Amin Rostami<sup>a</sup>

<sup>a</sup>Department of Chemistry, Faculty of Science, University of Kurdistan, 66177-15175, Sanandaj, Iran

<sup>b</sup>Department of Organic Chemistry, Faculty of Chemistry, Bu-Ali Sina University, Hamedan 6517838683, Iran

Corresponding authors: E-mail: [zolfi@basu.ac.ir](mailto:zolfi@basu.ac.ir), [mzolfigol@yahoo.com](mailto:mzolfigol@yahoo.com) (M.A. Zolfigol), and [a.rostami@uok.ac.ir](mailto:a.rostami@uok.ac.ir) (A. Rostami)

| S.No. | Table of Contents                                                             | Pages  |
|-------|-------------------------------------------------------------------------------|--------|
| I     | Characterization of NiFe <sub>2</sub> O <sub>4</sub> MNPs                     | S2-S4  |
| II    | Reaction optimization studies                                                 | S5-S6  |
| III   | Mass, <sup>1</sup> H NMR and selected <sup>13</sup> C NMR spectra of products | S7-S36 |
| IV    | References                                                                    | S37    |

## I. Characterization of NiFe<sub>2</sub>O<sub>4</sub> MNPs

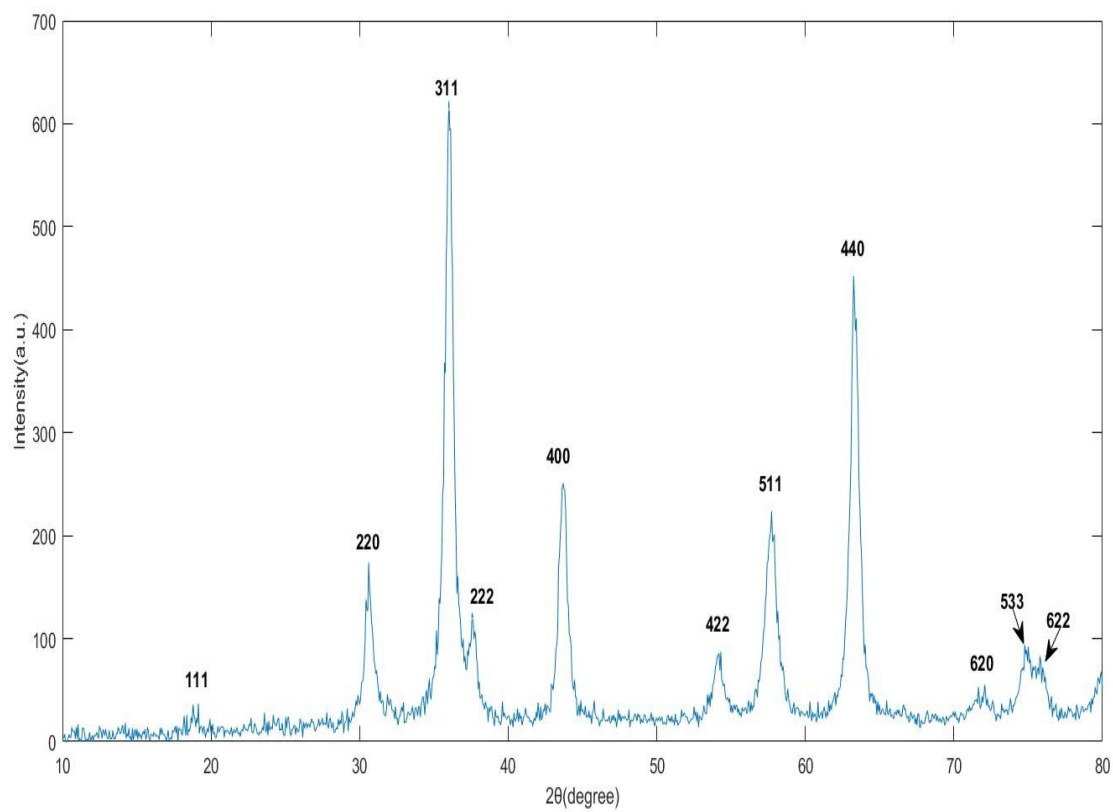

**Fig. S1** XRD pattern of NiFe<sub>2</sub>O<sub>4</sub> MNPs.

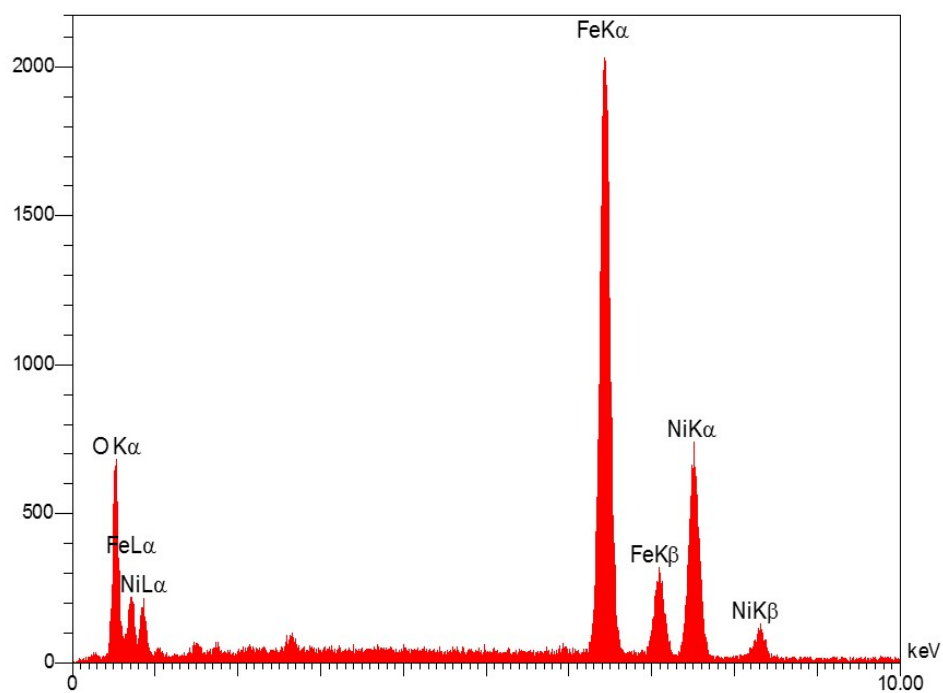

**Fig. S2** EDS spectrum of  $NiFe_2O_4$  MNPs.

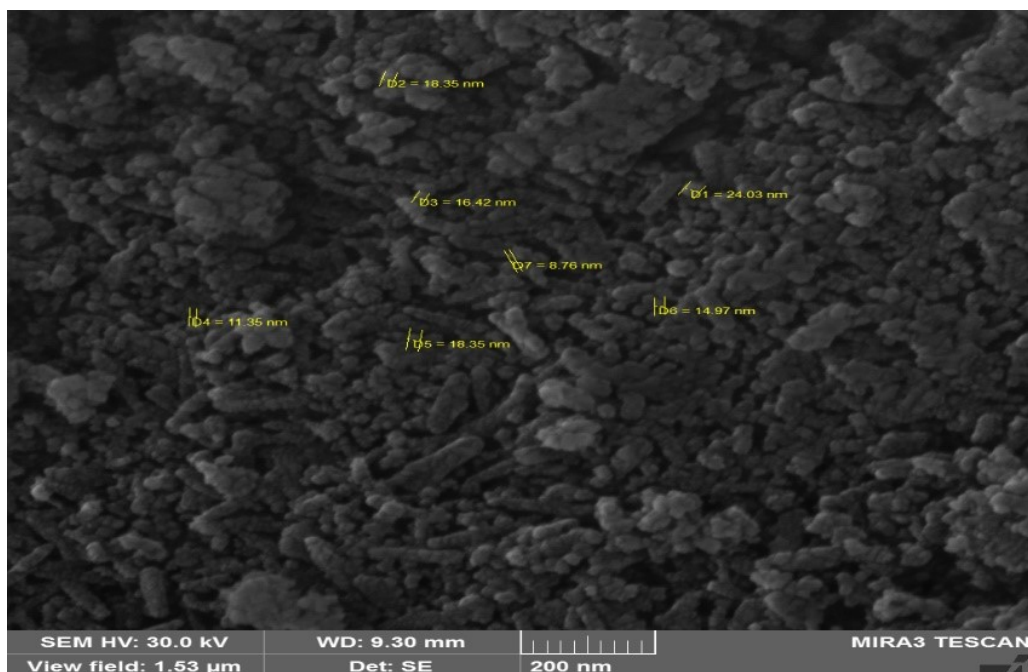

**Fig. S3** SEM image of  $NiFe_2O_4$  MNPs.

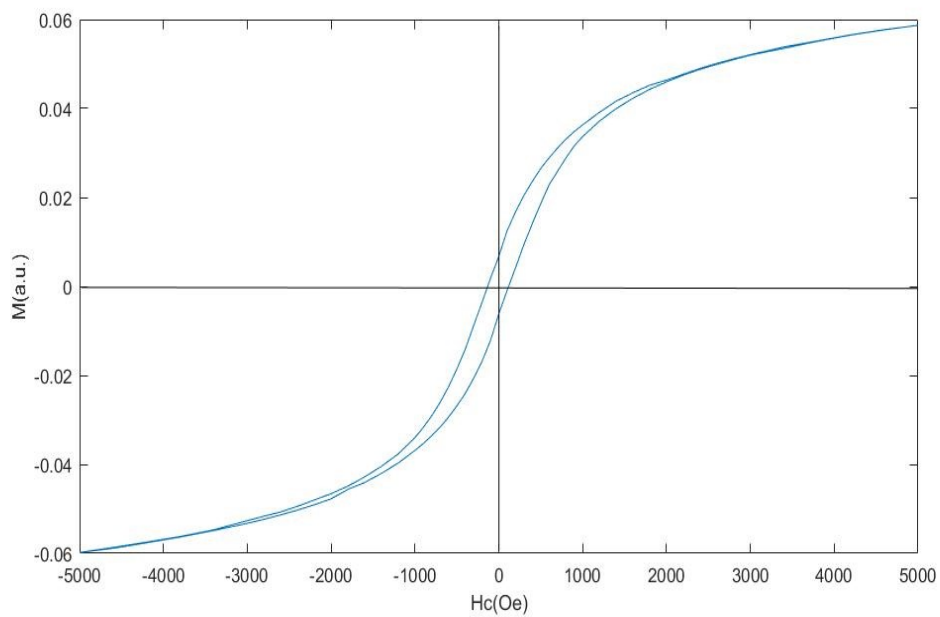

**Fig. S4** Magnetization curve for NiFe<sub>2</sub>O<sub>4</sub> MNPs.

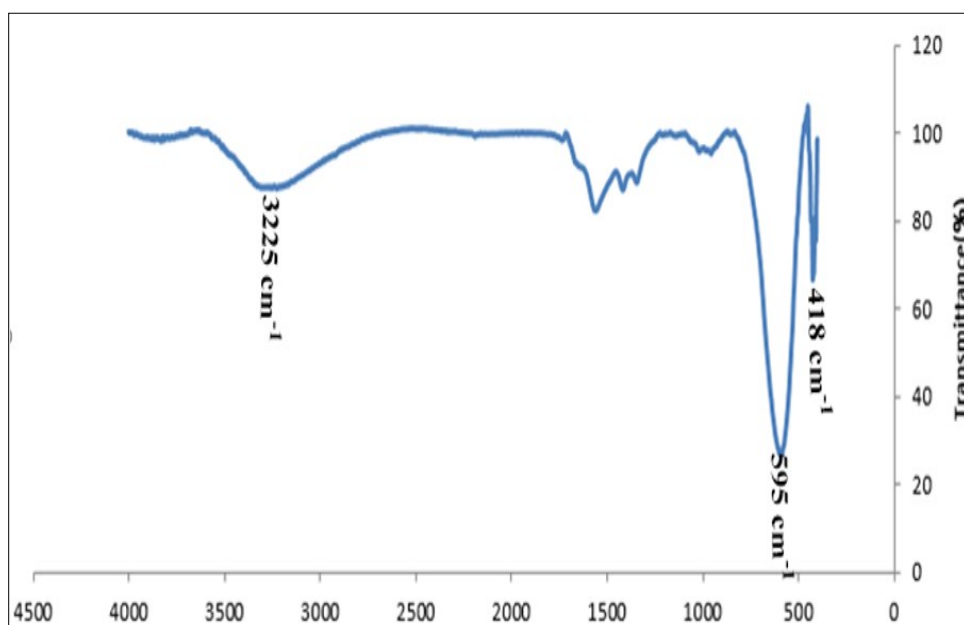

**Fig. S5** FT-IR spectra of NiFe<sub>2</sub>O<sub>4</sub> MNPs.

## II. Reaction optimization studies

**Table S1.** Optimization of the reaction conditions for the reaction of phenyl acetate, triphenyltin chloride, and elemental selenium in the presence of homogenous<sup>[a]</sup> and heterogeneous<sup>[b]</sup> catalysts

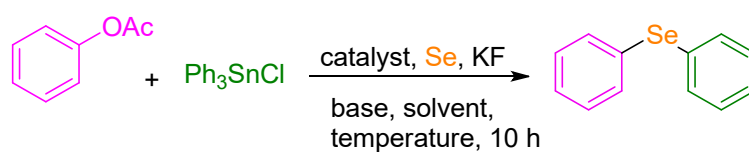

| Entry                   | Catalyst                             | Base                               | Solvent       | Temperature. (°C) | GC Yield (%) |
|-------------------------|--------------------------------------|------------------------------------|---------------|-------------------|--------------|
| 1                       | Cu(OAc) <sub>2</sub>                 | K <sub>2</sub> CO <sub>3</sub>     | Dioxane       | 100               | 35           |
| 2                       | Cu(OAc) <sub>2</sub>                 | K <sub>2</sub> CO <sub>3</sub>     | DMF           | 100               | 80           |
| <b>3<sup>[a]</sup></b>  | <b>Cu(OAc)<sub>2</sub></b>           | <b>K<sub>2</sub>CO<sub>3</sub></b> | <b>PEG200</b> | <b>100</b>        | <b>100</b>   |
| 4                       | Cu(OAc) <sub>2</sub>                 | KOH                                | PEG200        | 100               | trace        |
| 5                       | Cu(OAc) <sub>2</sub>                 | NaOH                               | PEG200        | 100               | trace        |
| 6                       | Cu(OAc) <sub>2</sub>                 | Cs <sub>2</sub> CO <sub>3</sub>    | PEG200        | 100               | 40           |
| 7                       | CuCl <sub>2</sub>                    | K <sub>2</sub> CO <sub>3</sub>     | PEG200        | 100               | 47           |
| 8                       | CuI                                  | K <sub>2</sub> CO <sub>3</sub>     | PEG200        | 100               | 55           |
| 9                       | Cu(OAc) <sub>2</sub>                 | K <sub>2</sub> CO <sub>3</sub>     | PEG200        | 80                | 61           |
| 10                      | Cu(OAc) <sub>2</sub>                 | K <sub>2</sub> CO <sub>3</sub>     | PEG200        | 90                | 78           |
| 11                      | NiFe <sub>2</sub> O <sub>4</sub>     | K <sub>2</sub> CO <sub>3</sub>     | PEG200        | 100               | 79           |
| 12                      | NiFe <sub>2</sub> O <sub>4</sub>     | K <sub>2</sub> CO <sub>3</sub>     | PEG200        | 110               | 89           |
| <b>13<sup>[b]</sup></b> | <b>NiFe<sub>2</sub>O<sub>4</sub></b> | <b>K<sub>2</sub>CO<sub>3</sub></b> | <b>PEG200</b> | <b>120</b>        | <b>99</b>    |
| 14                      | CuFe <sub>2</sub> O <sub>4</sub>     | K <sub>2</sub> CO <sub>3</sub>     | PEG200        | 120               | 88           |
| 15                      | CuNiFe <sub>2</sub> O <sub>4</sub>   | K <sub>2</sub> CO <sub>3</sub>     | PEG200        | 120               | 87           |

<sup>[a]</sup>Reactions conditions: phenyl acetate (1 mmol), triphenyltin chloride (0.5 mmol), Se (1.5 mmol), Cu(OAc)<sub>2</sub> (25 mol %), KF (3 mmol), K<sub>2</sub>CO<sub>3</sub> (2 mmol), solvent (2 mL).

<sup>[b]</sup>Reactions conditions: phenylacetate (1 mmol), triphenyltin chloride (0.5 mmol), Se (1.5 mmol), NiFe<sub>2</sub>O<sub>4</sub> (25 mol %), KF (3 mmol), K<sub>2</sub>CO<sub>3</sub> (2 mmol), solvent (2 mL).

<sup>[a],[b]</sup> **Most effective reaction conditions.**

**Table S2.** Optimization of the reaction conditions for the reaction of nitrobenzene, triphenyltin chloride and elemental selenium in the presence of homogenous<sup>[a]</sup> and heterogeneous<sup>[b]</sup> catalyst

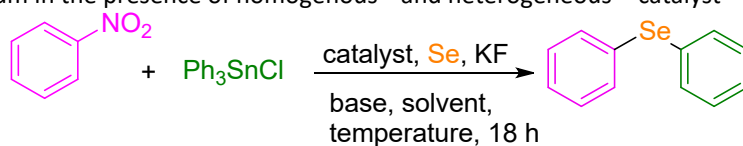

| Entry                   | Catalyst                             | Base                               | Solvent       | Temperature (°C) | GC Yield (%) |
|-------------------------|--------------------------------------|------------------------------------|---------------|------------------|--------------|
| 1                       | Cu(OAc) <sub>2</sub>                 | K <sub>2</sub> CO <sub>3</sub>     | Dioxane       | 110              | 20           |
| 2                       | Cu(OAc) <sub>2</sub>                 | K <sub>2</sub> CO <sub>3</sub>     | DMF           | 110              | 65           |
| <b>3<sup>[a]</sup></b>  | <b>Cu(OAc)<sub>2</sub></b>           | <b>K<sub>2</sub>CO<sub>3</sub></b> | <b>PEG200</b> | <b>110</b>       | <b>100</b>   |
| 4                       | Cu(OAc) <sub>2</sub>                 | KOH                                | PEG200        | 110              | trace        |
| 5                       | Cu(OAc) <sub>2</sub>                 | NaOH                               | PEG200        | 110              | trace        |
| 6                       | Cu(OAc) <sub>2</sub>                 | Cs <sub>2</sub> CO <sub>3</sub>    | PEG200        | 110              | 28           |
| 7                       | CuCl <sub>2</sub>                    | K <sub>2</sub> CO <sub>3</sub>     | PEG200        | 110              | 36           |
| 8                       | CuI                                  | K <sub>2</sub> CO <sub>3</sub>     | PEG200        | 110              | 49           |
| 9                       | Cu(OAc) <sub>2</sub>                 | K <sub>2</sub> CO <sub>3</sub>     | PEG200        | 90               | 58           |
| 10                      | Cu(OAc) <sub>2</sub>                 | K <sub>2</sub> CO <sub>3</sub>     | PEG200        | 100              | 70           |
| 11                      | NiFe <sub>2</sub> O <sub>4</sub>     | K <sub>2</sub> CO <sub>3</sub>     | PEG200        | 110              | 74           |
| 12                      | NiFe <sub>2</sub> O <sub>4</sub>     | K <sub>2</sub> CO <sub>3</sub>     | PEG200        | 120              | 85           |
| <b>13<sup>[b]</sup></b> | <b>NiFe<sub>2</sub>O<sub>4</sub></b> | <b>K<sub>2</sub>CO<sub>3</sub></b> | <b>PEG200</b> | <b>130</b>       | <b>98</b>    |
| 14                      | CuFe <sub>2</sub> O <sub>4</sub>     | K <sub>2</sub> CO <sub>3</sub>     | PEG200        | 130              | 85           |
| 15                      | CuNiFe <sub>2</sub> O <sub>4</sub>   | K <sub>2</sub> CO <sub>3</sub>     | PEG200        | 130              | 83           |

<sup>[a]</sup>Reactions conditions: nitrobenzene (1 mmol), triphenyltin chloride (0.5 mmol), Se (1.5 mmol), Cu(OAc)<sub>2</sub> (20 mol %), KF (3 mmol), K<sub>2</sub>CO<sub>3</sub> (4 mmol), solvent (2 mL).

<sup>[b]</sup>Reactions conditions: nitrobenzene (1 mmol), Se (1.5 mmol), triphenyltin chloride (0.5 mmol), NiFe<sub>2</sub>O<sub>4</sub> (25 mol %), KF (3 mmol), K<sub>2</sub>CO<sub>3</sub> (4 mmol), solvent (2 mL).

III. Mass,  $^1\text{H}$  NMR  
Diphenyl-selenide  
( $6\text{H}$ );  $^{13}\text{C}$  NMR ( $\text{CDCl}_3$ ,

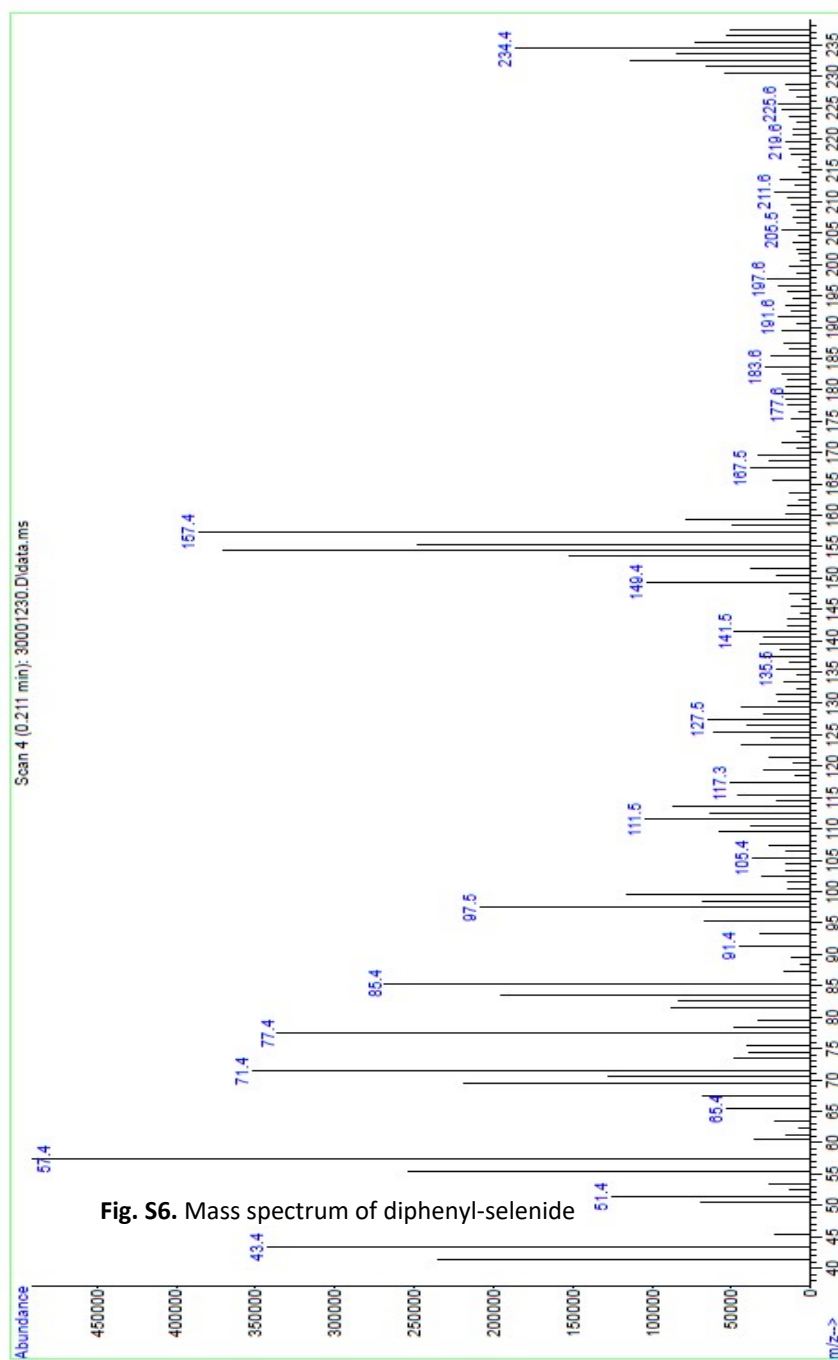

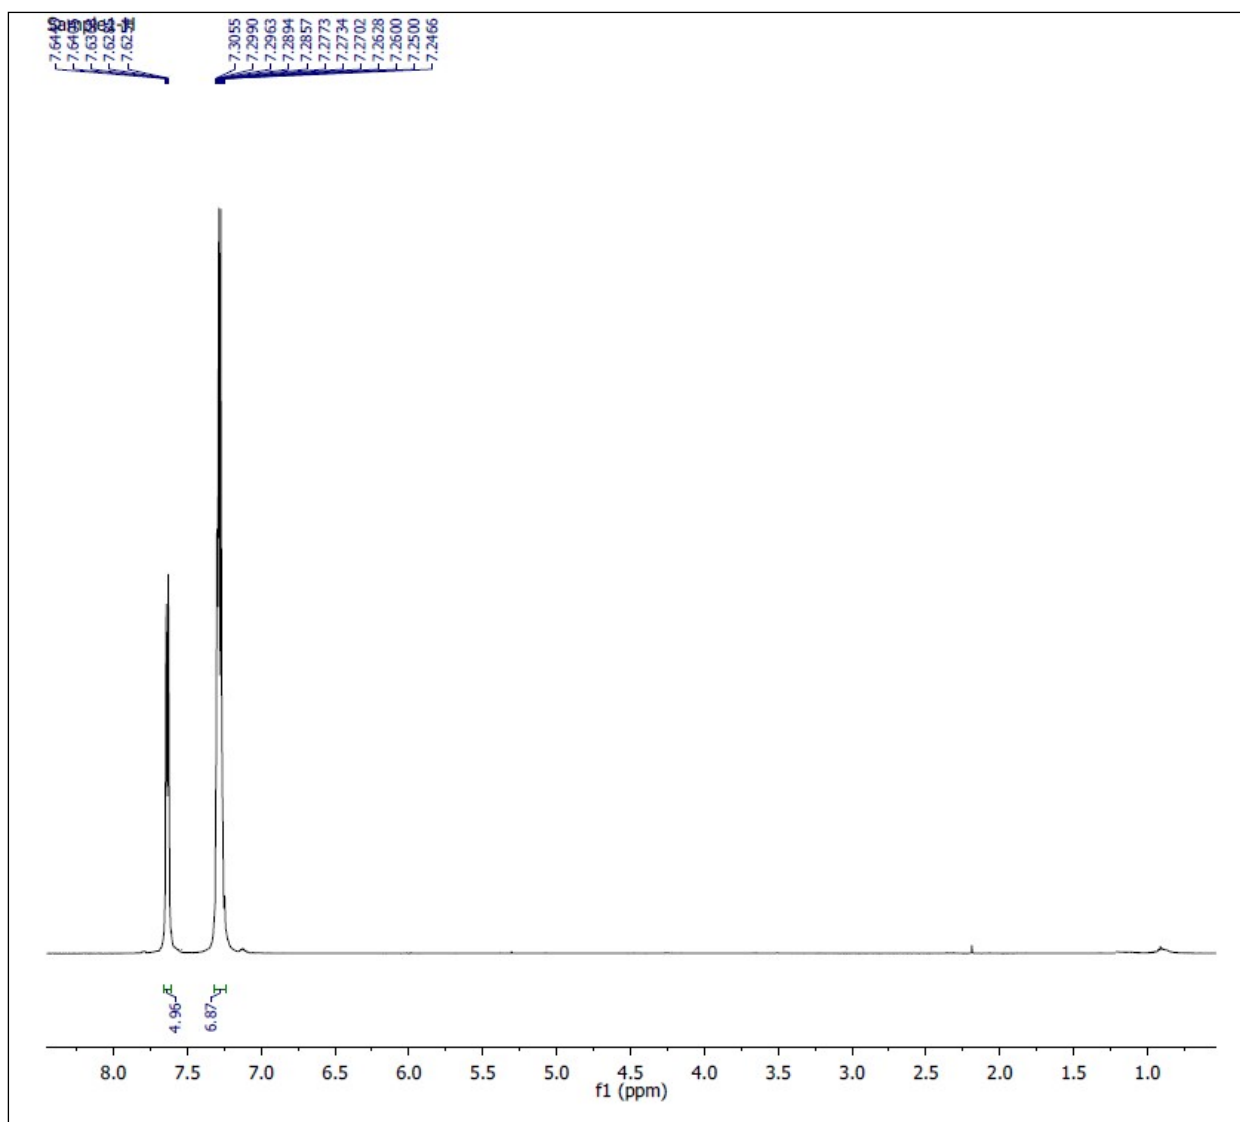

**Fig. S7.**  $^1\text{H}$  NMR spectrum of diphenyl-selenide in  $\text{CDCl}_3$



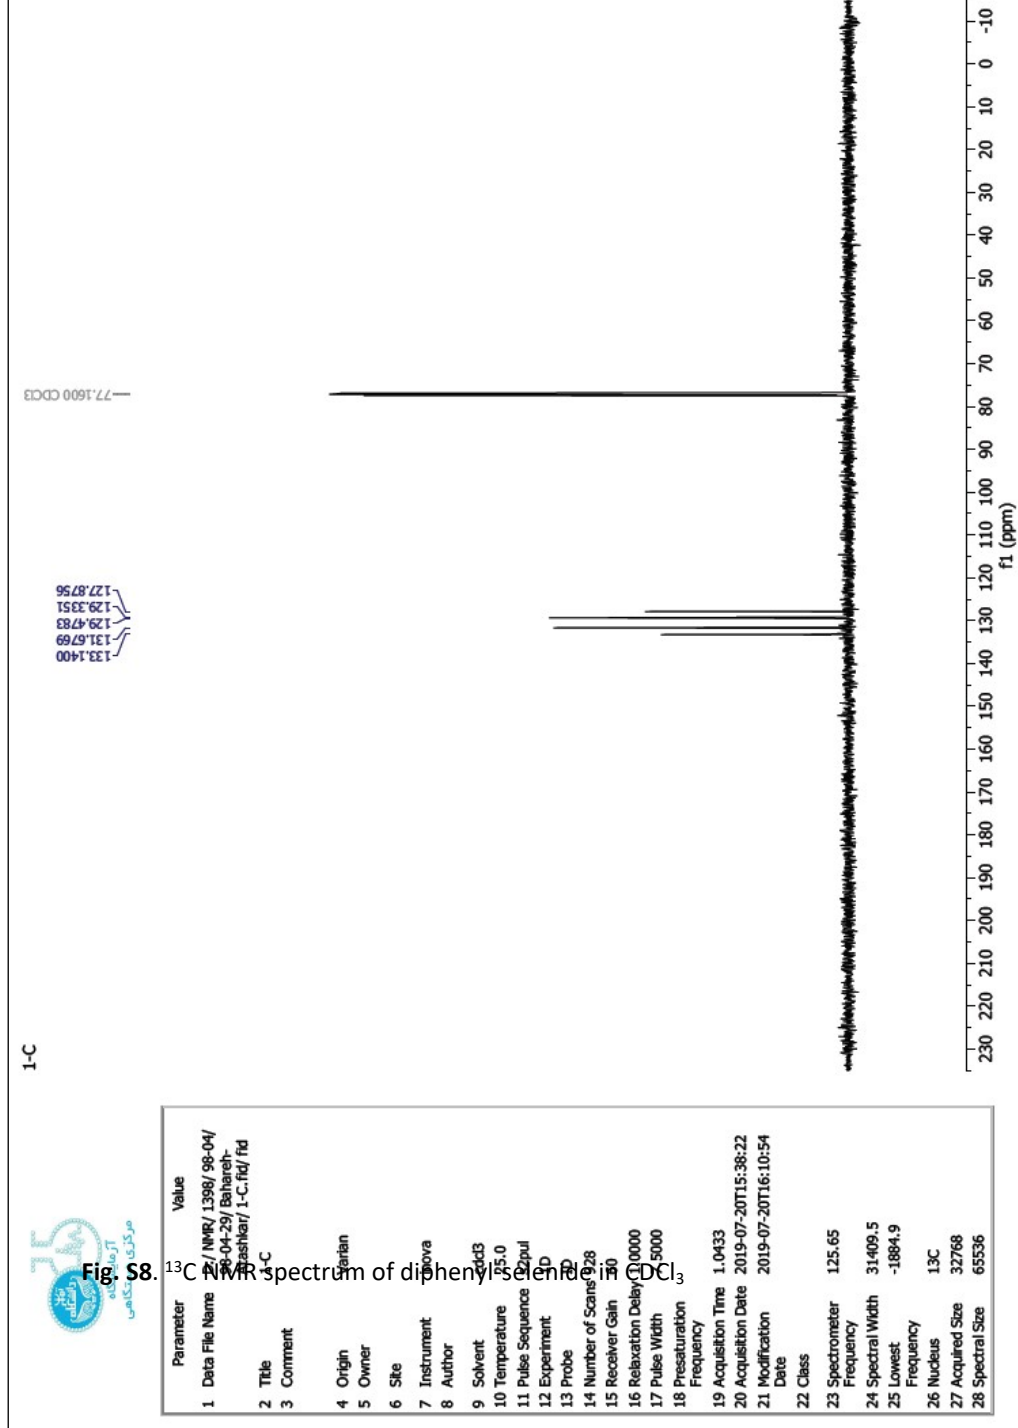

**4-Tolyl-phenyl-selenide [1]:** oil; MS: 248.7 m/z; <sup>1</sup>H NMR (CDCl<sub>3</sub>, 500 MHz): δ 7.67-7.65 (m, 2H); 7.47-7.46 (m, 2H); 7.32-7.26 (m, 3H); 7.16-7.11 (m, 2H); 2.38 (s, 3H); <sup>13</sup>C NMR (CDCl<sub>3</sub>, 500 MHz): 134.0, 132.2, 131.7, 130.3, 129.3, 127.9, 127.0, 29.8.

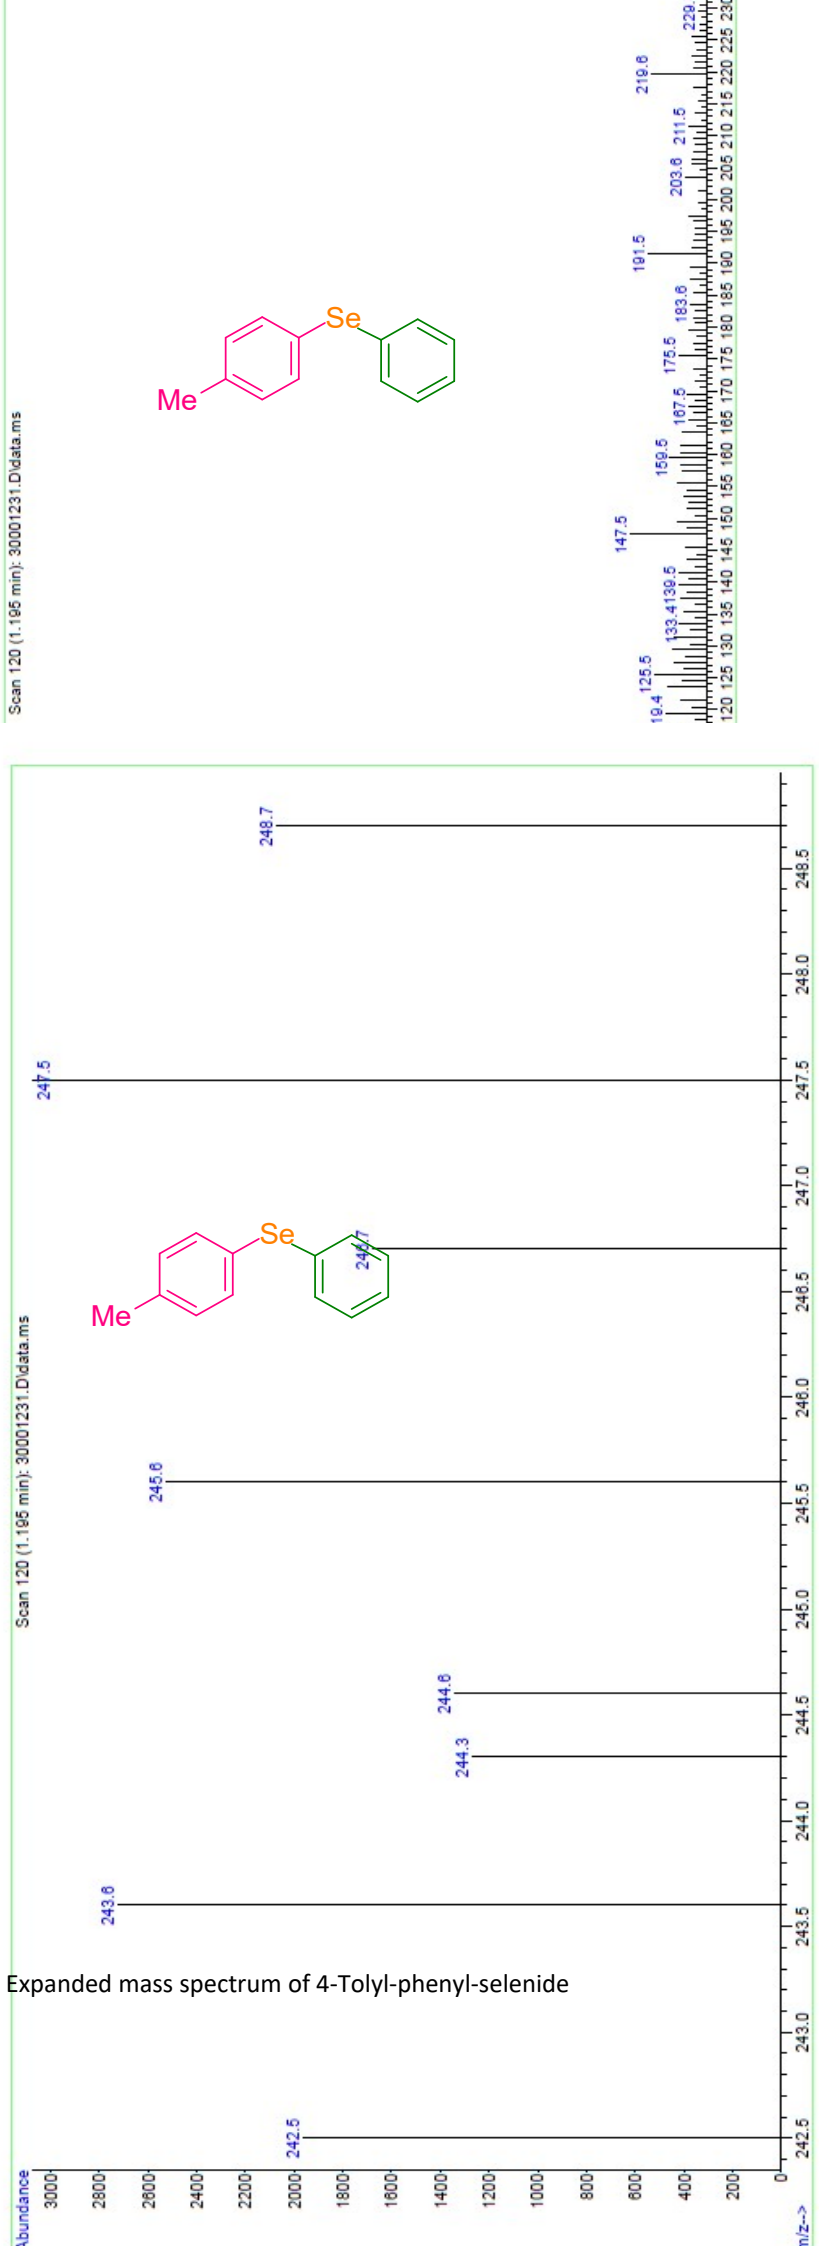

Fig. S10. Expanded mass spectrum of 4-Tolyl-phenyl-selenide

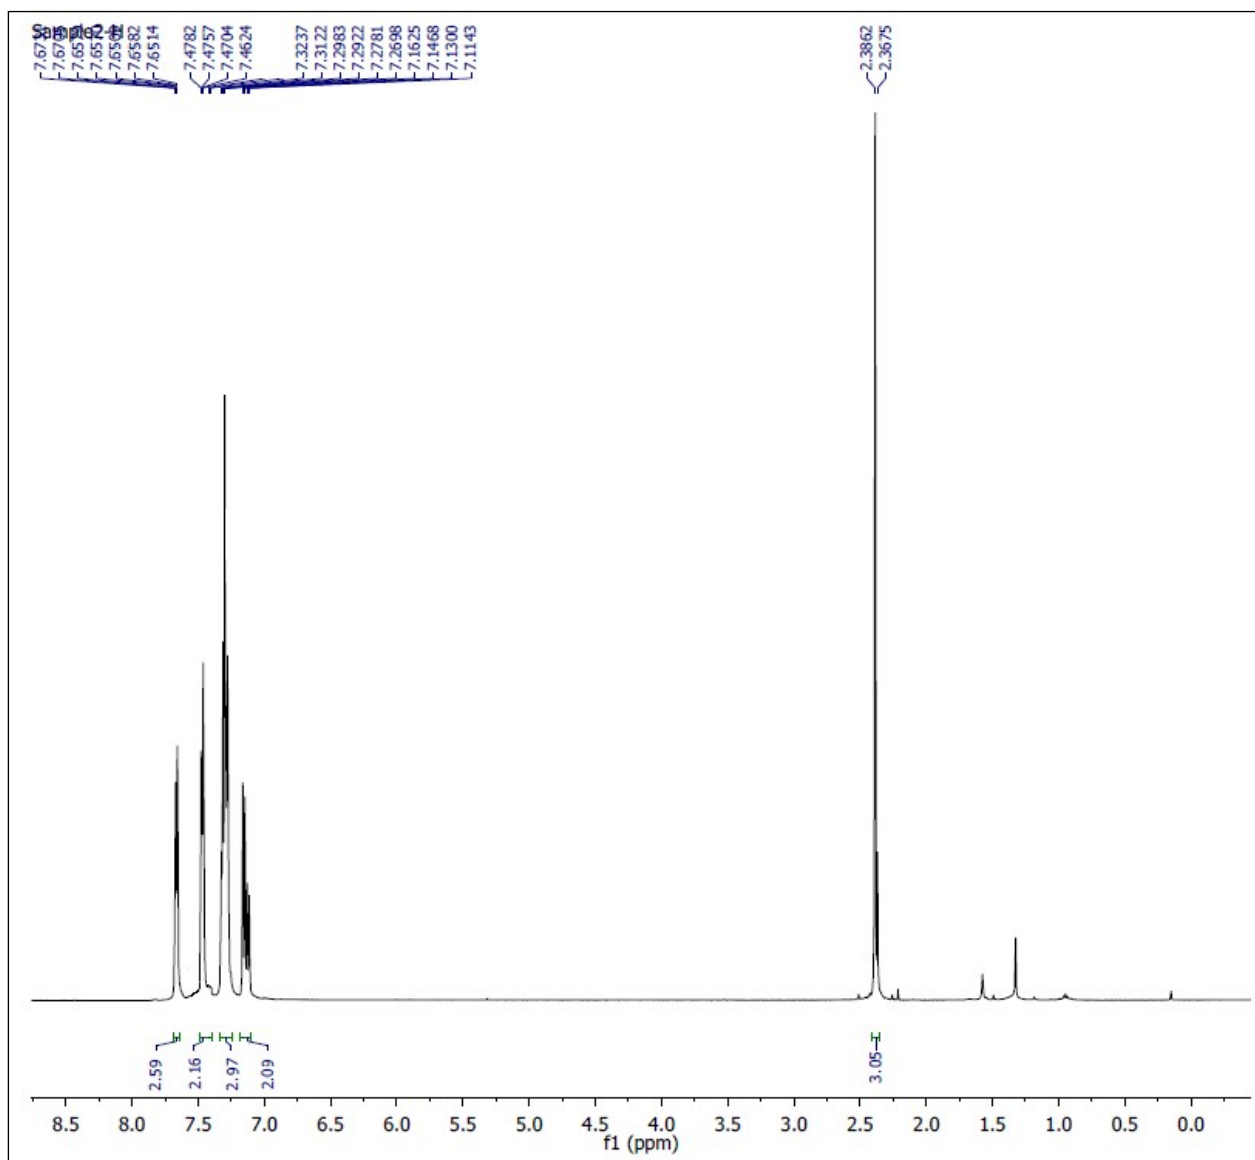

**Fig. S11.**  $^1\text{H}$  NMR spectrum of 4-Tolyl-phenyl-selenide

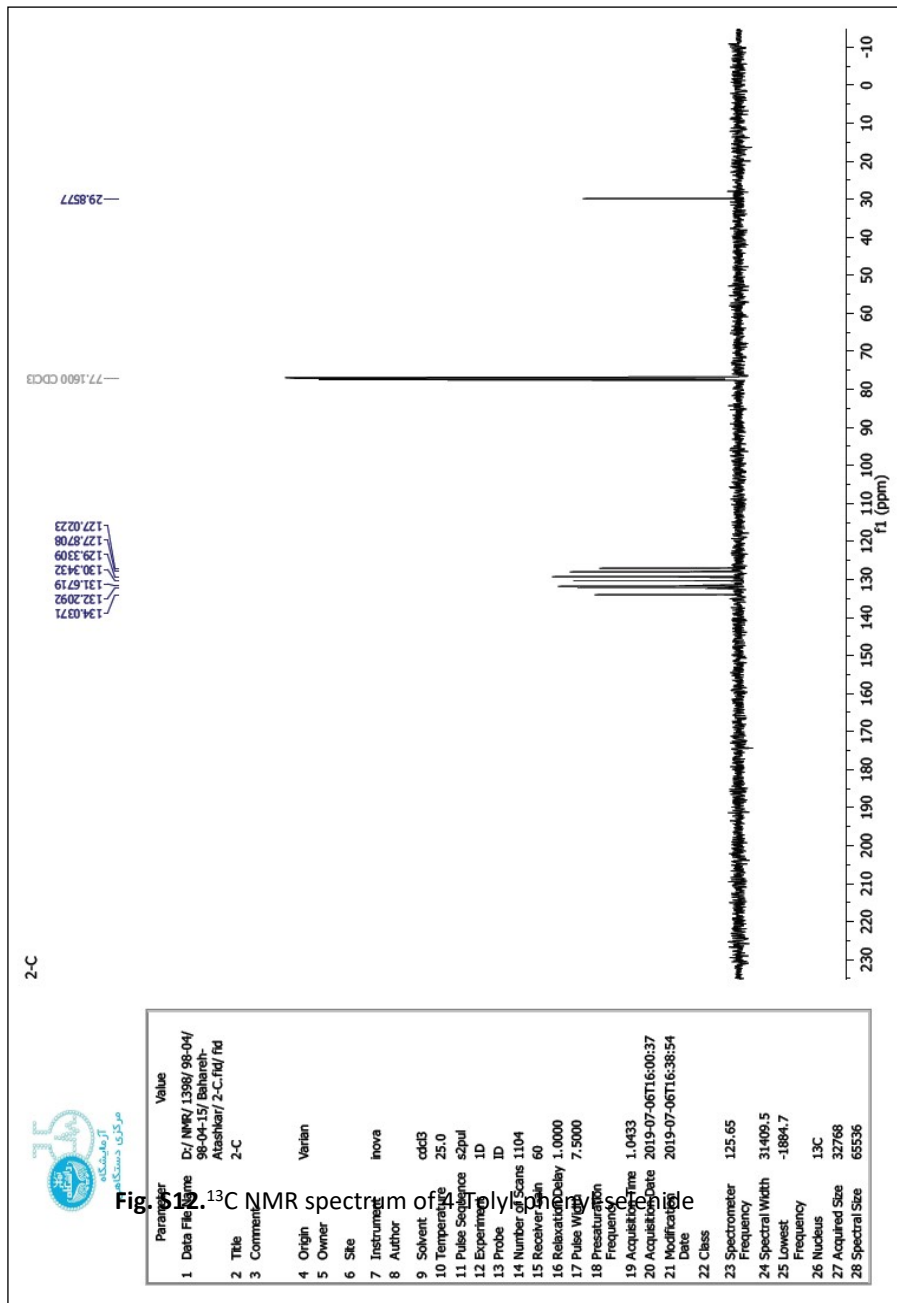

Fig. 19. <sup>13</sup>C NMR spectrum of 2-C

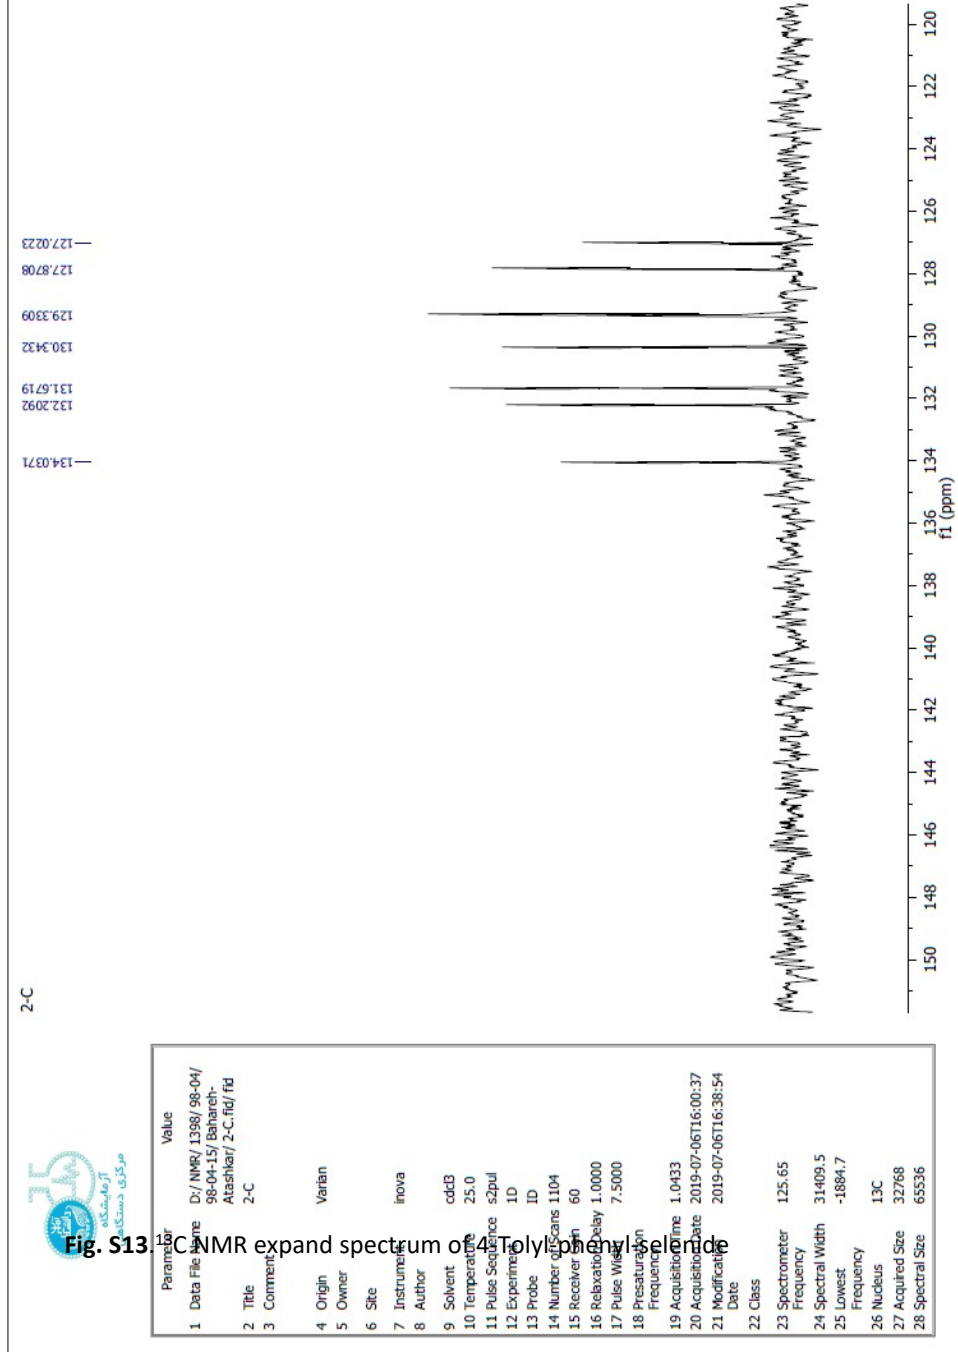

Fig. S13.  $^{13}\text{C}$  NMR expand spectrum of 4-Chlorophenyl-phenyl-selenide

**4-Chlorophenyl-phenyl-selenide [1]:** oil: MS: 268 m/e;  $^1\text{H}$  NMR ( $\text{CDCl}_3$ , 500 MHz):  $\delta$  7.73 (d,  $J = 10$  Hz, 2H); 7.61 (d,  $J = 10$  Hz, 2H); 7.28-7.26 (m, 3H); 7.24-7.12 (m, 2H);  $^{13}\text{C}$  NMR ( $\text{CDCl}_3$ , 500 MHz): 134.9, 133.7, 133.1, 131.9, 130.7, 129.9, 128.1.

Fig. S14. Mass spectrum of

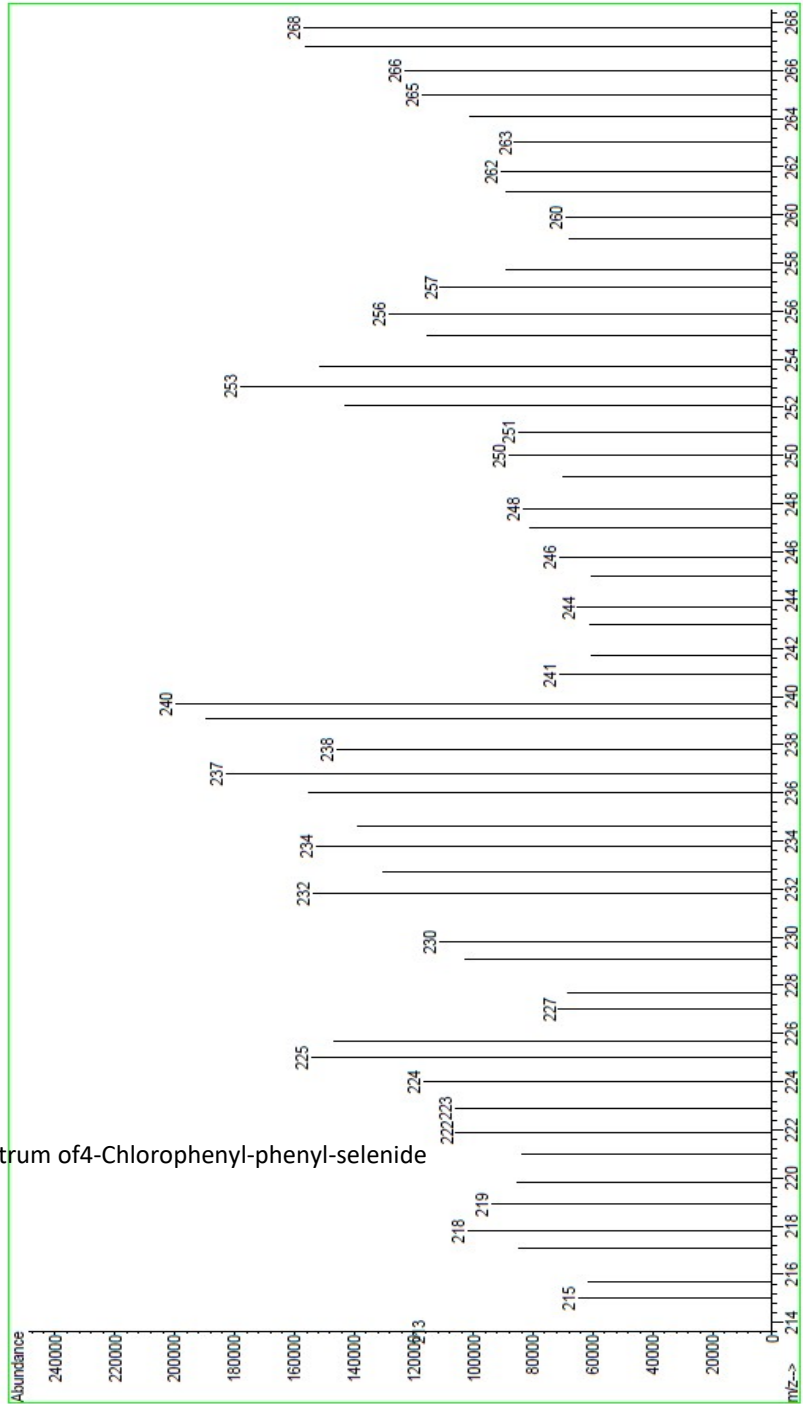

Fig. S15. Expanded mass spectrum of 4-Chlorophenyl-phenyl-selenide

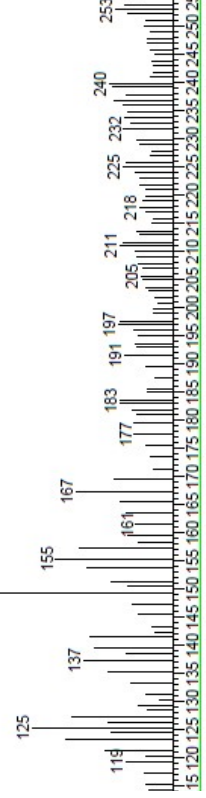

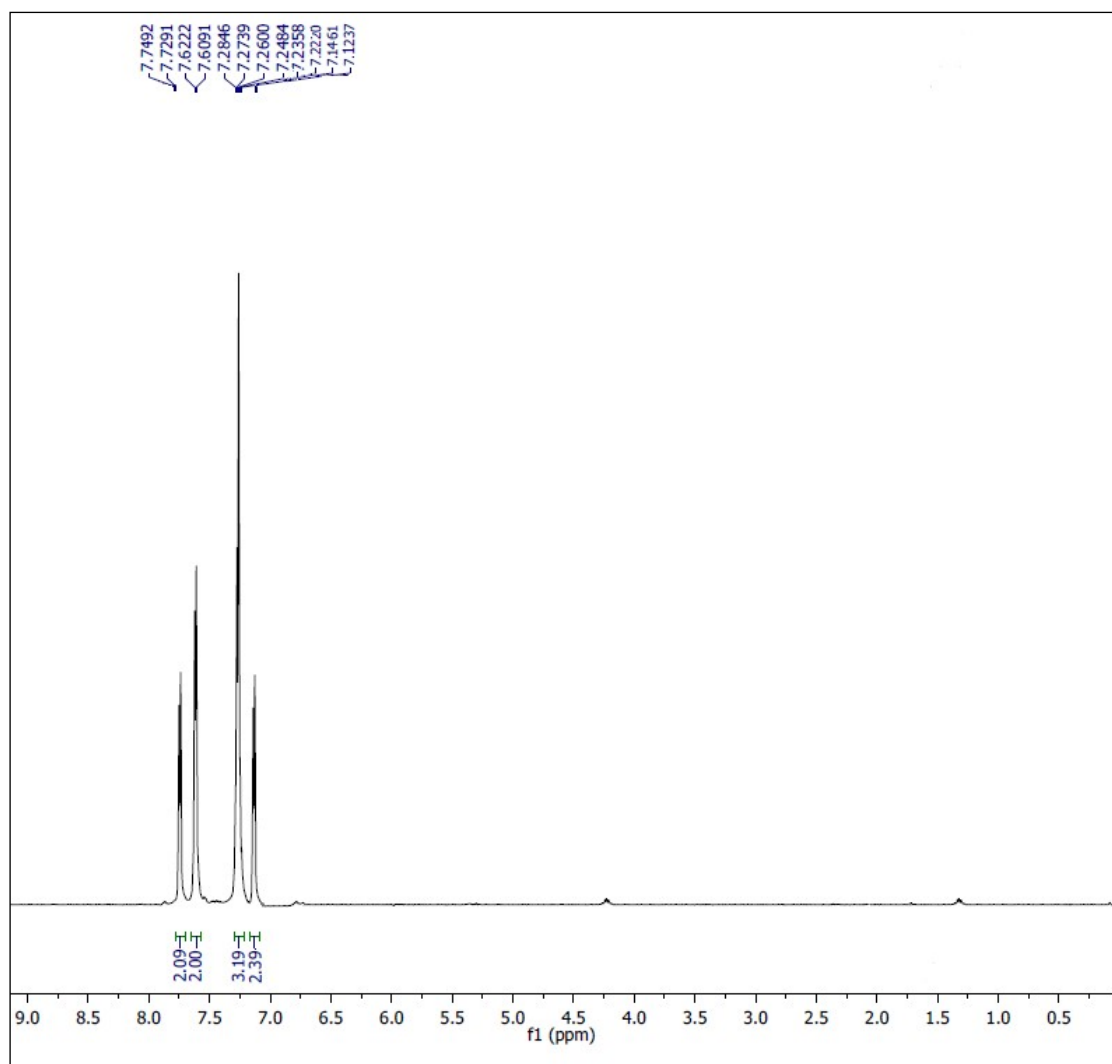

**Fig. S16.** <sup>1</sup>H NMR spectrum of 4-Chlorophenyl-phenyl-selenide

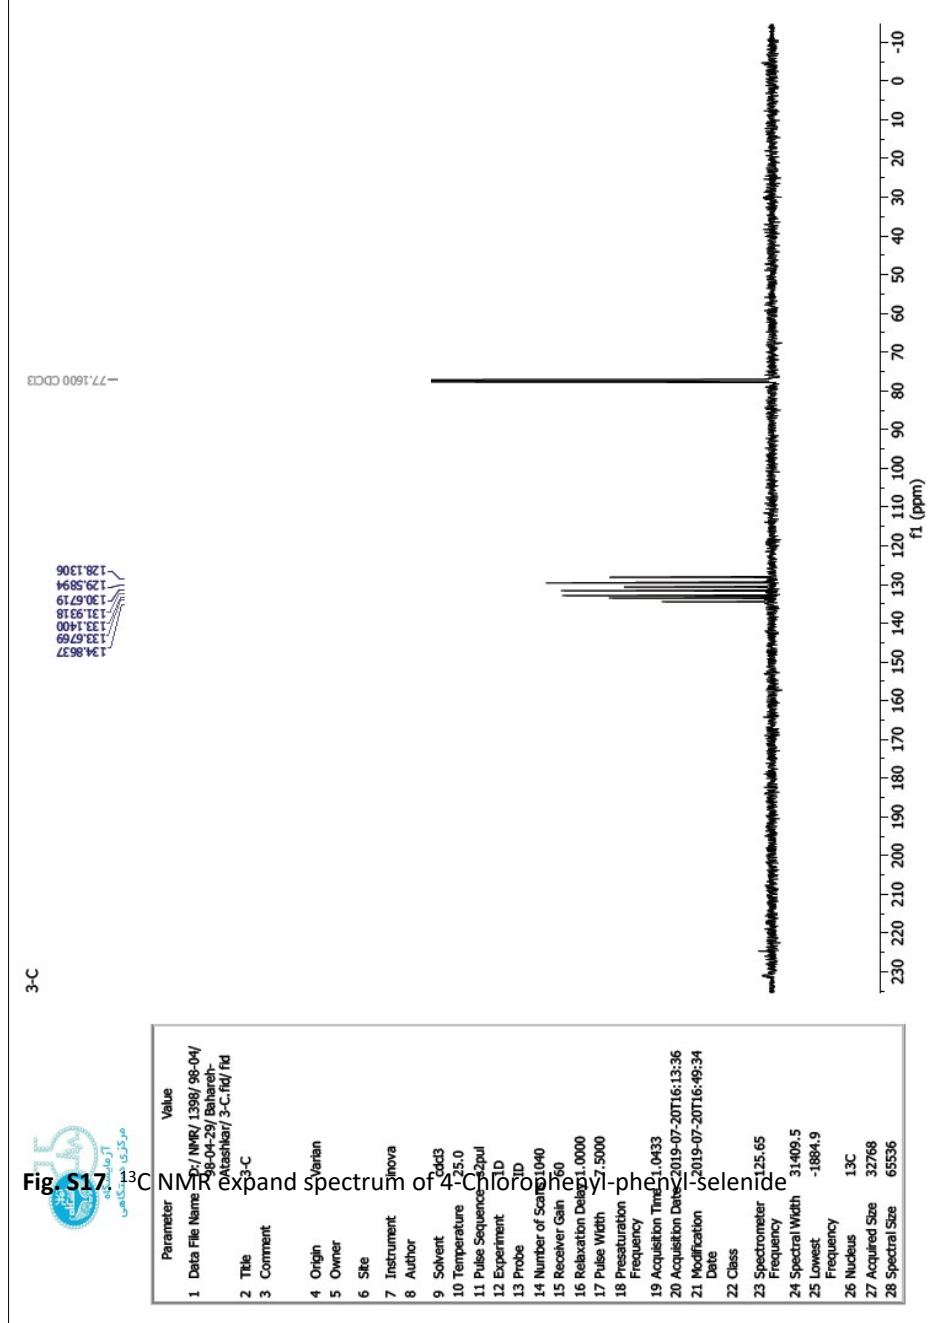

Fig. S17. <sup>13</sup>C NMR expand spectrum of 4-Chlorophenyl-phenyl-selenide

**2-Tolyl-phenyl-selenide [1]:** oil: MS: 248.1 m/e; <sup>1</sup>H NMR (CDCl<sub>3</sub>, 500 MHz): δ 7.62-7.49 (m, 2H); 7.48-7.47 (m, 1H); 7.27-7.25 (m, 5H); 7.23-7.22 (m, 1H); 2.43 (s, 3H).



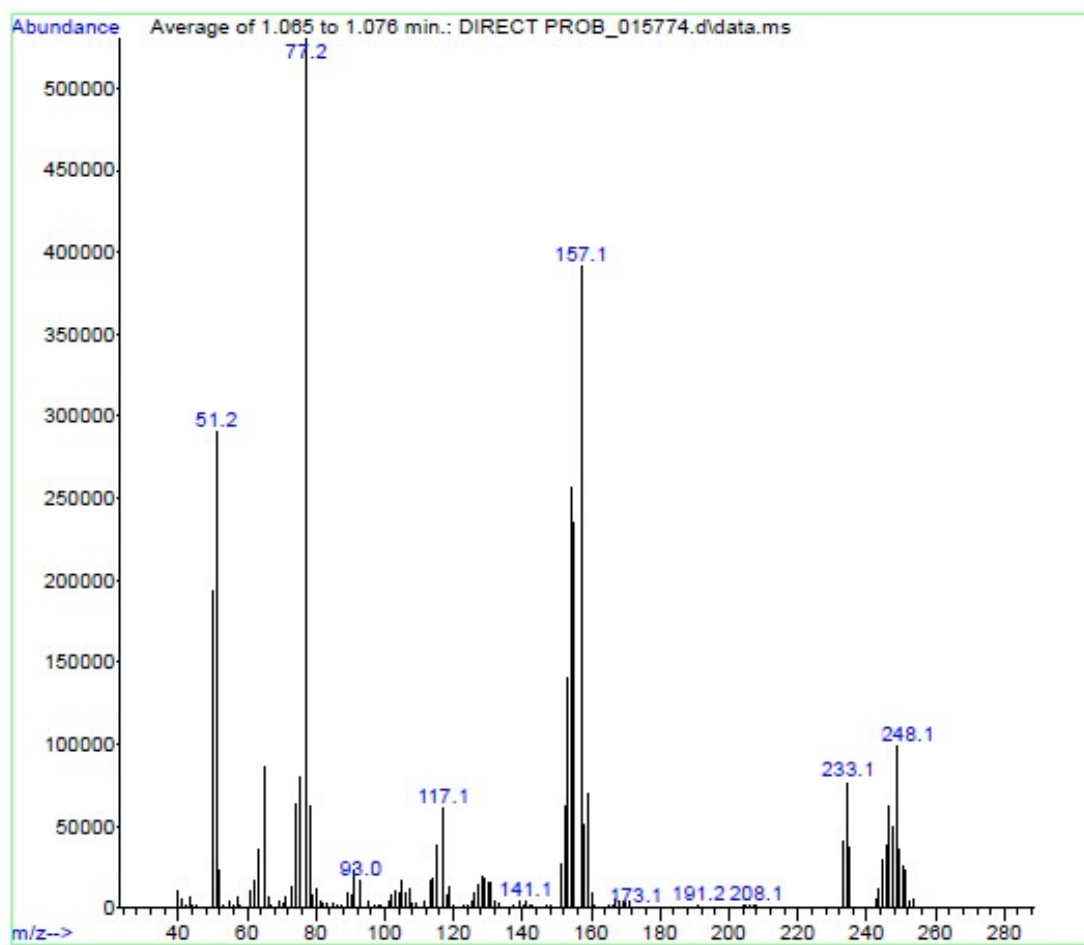

Fig. S18. Mass spectrum of 2-Tolyl-phenyl-selenide

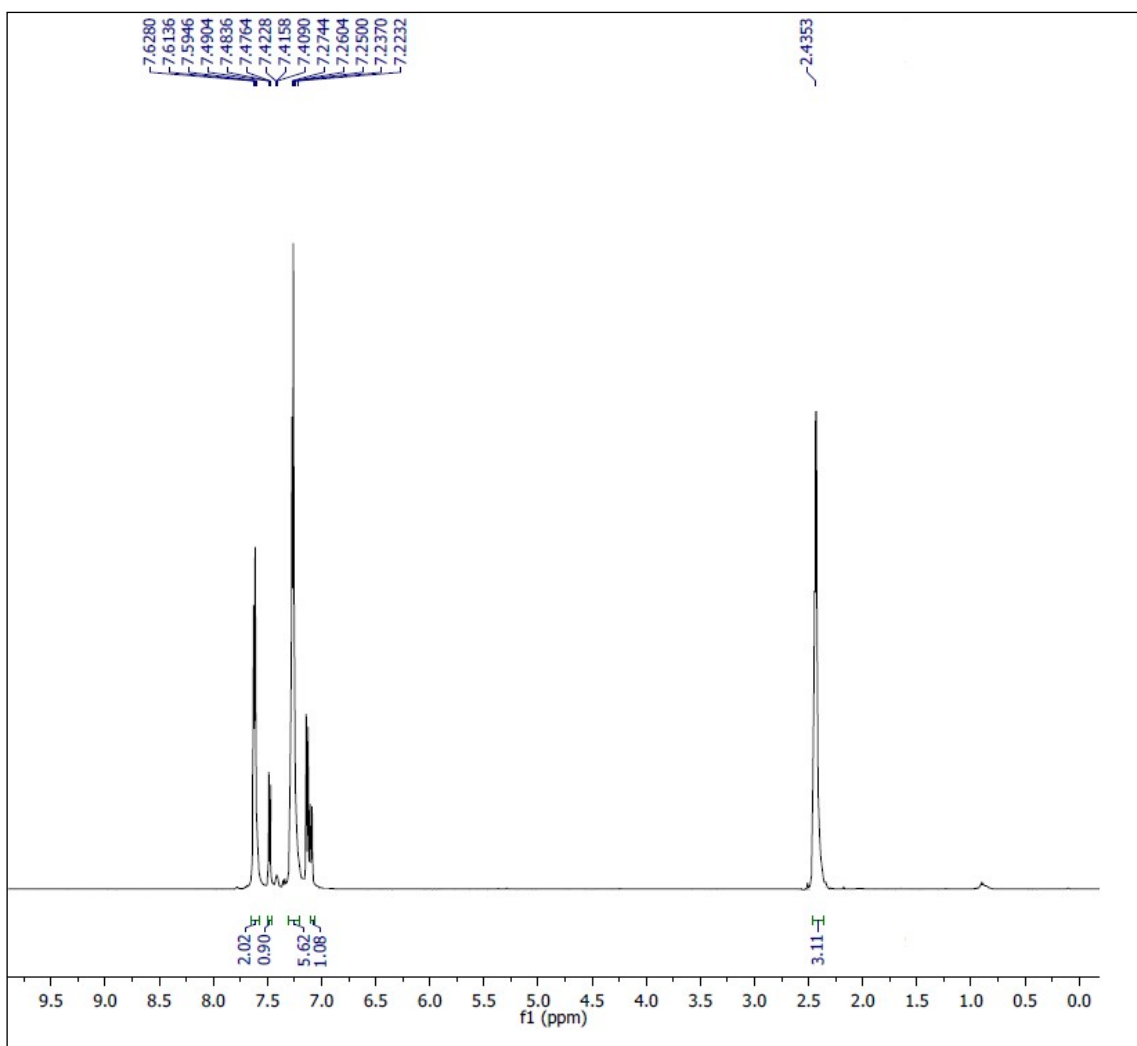

Fig. S19.  $^1\text{H}$  NMR spectrum of 2-Tolyl-phenyl-selenide

**2-Nitrophenyl-phenyl**

$\delta$  8.31 (dd,  $J = 9.15, 0.6$  Hz

3, 500 MHz):

7.75, 1H).

**Fig. S20.** Mass spectrum of 2-Nitrophenyl-phenyl-selenide

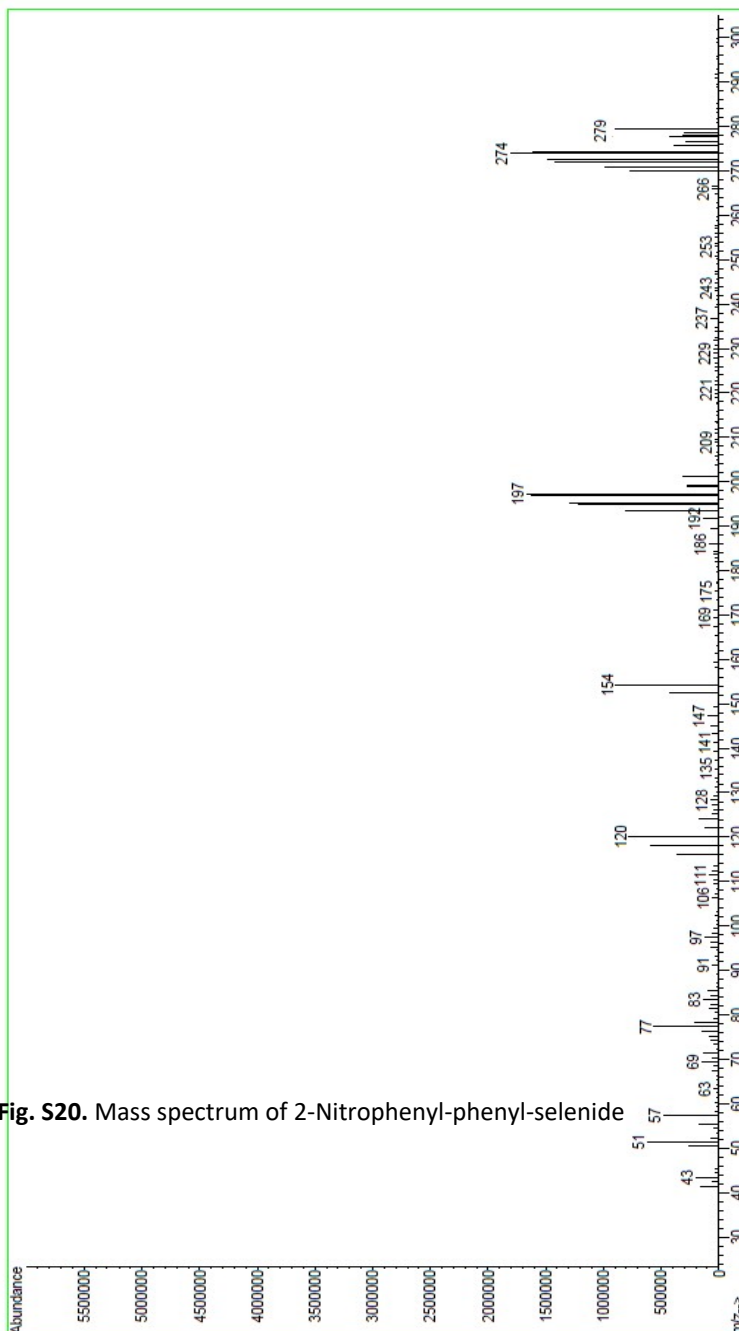

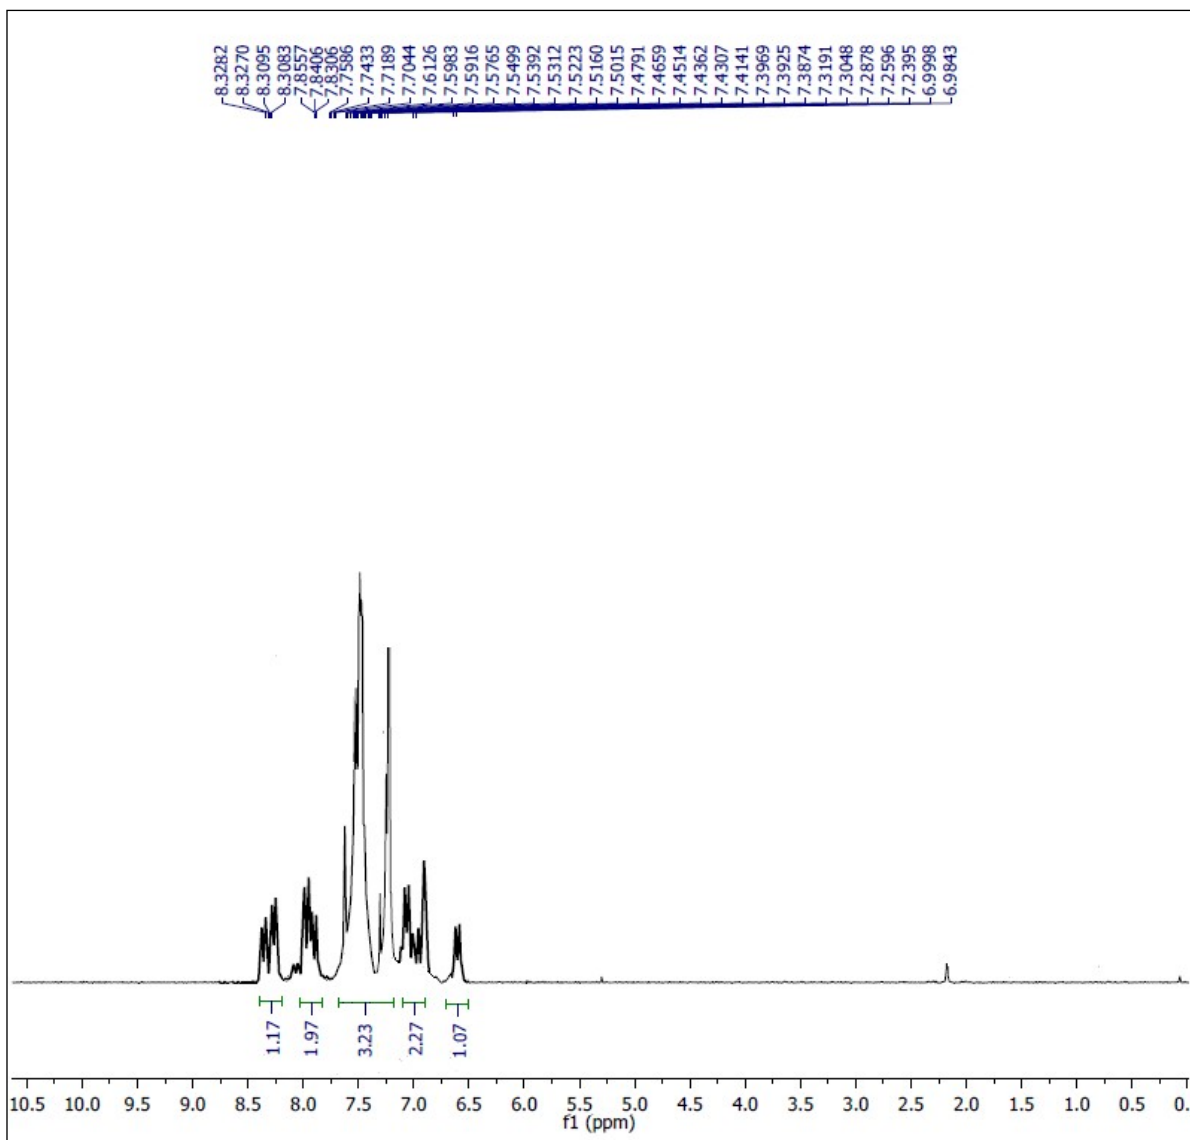

Fig. 21S. <sup>1</sup>H NMR spectrum of 2-Nitrophenyl-phenyl-selenide

**3-Nitrophenyl-phen**  
8.07 (dd, J = 10, 2 Hz, 1H

. (s, 1H);

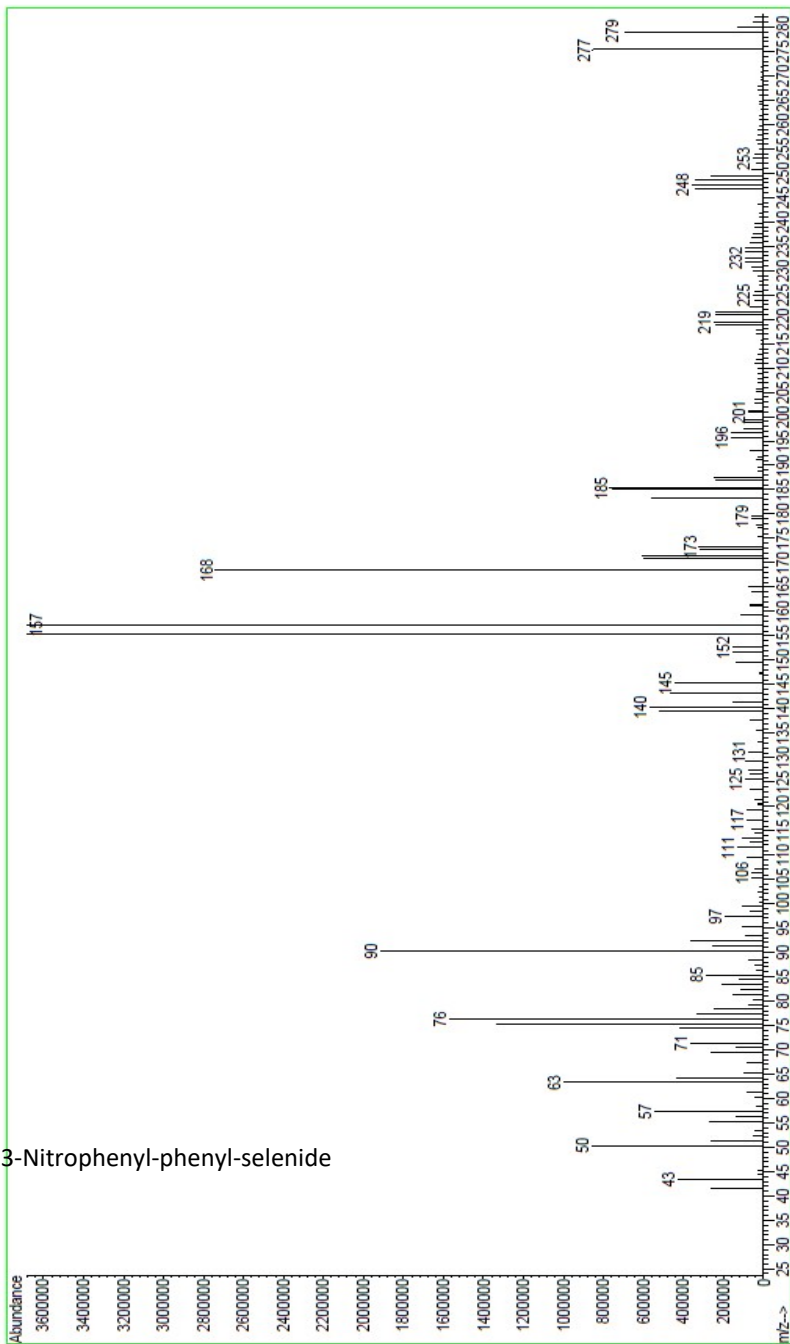

**Fig. S22.** Mass spectrum of 3-Nitrophenyl-phenyl-selenide

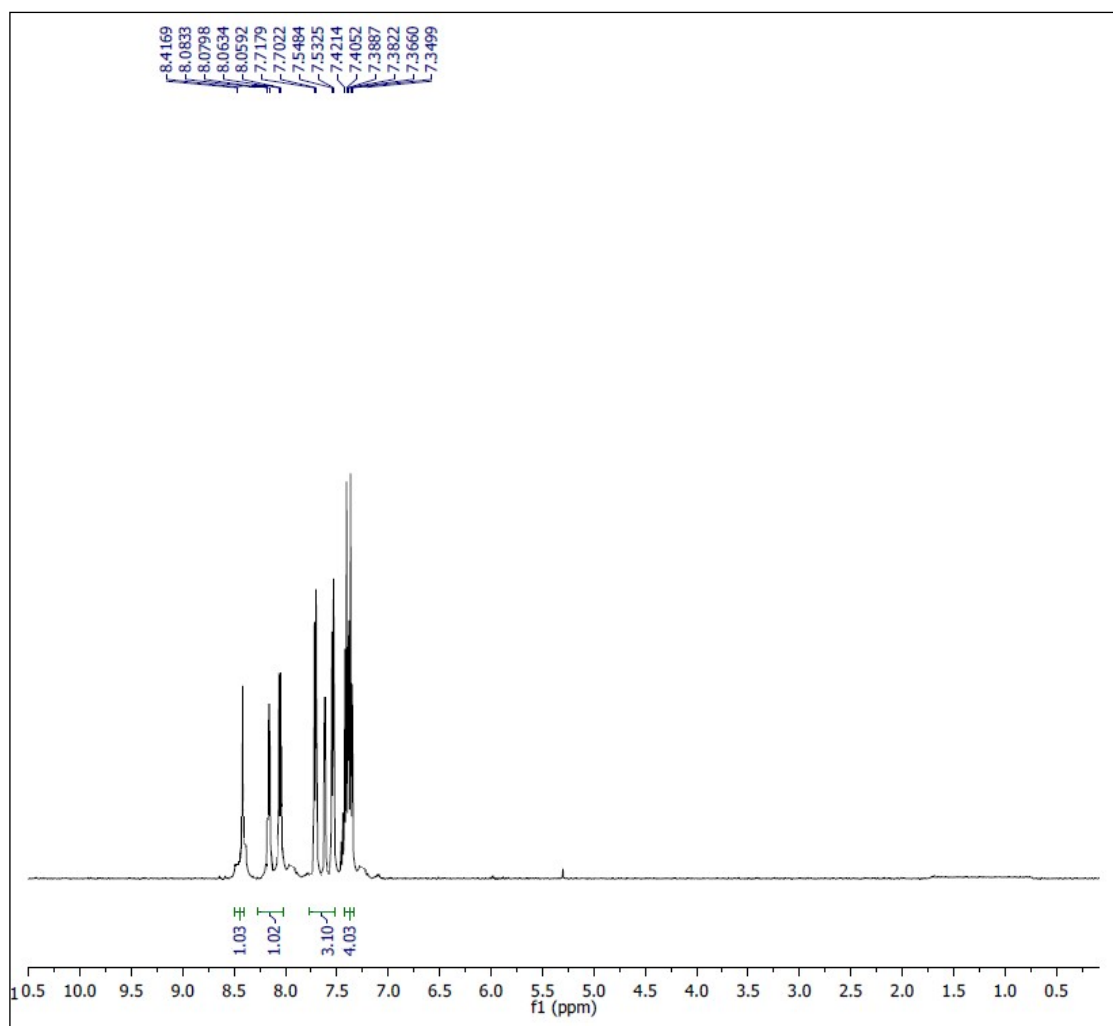

**Fig. S23.** <sup>1</sup>H NMR spectrum of 3-Nitrophenyl-phenyl-selenide

**Naphthalen-2-yl(phenyl)**  
8.01 (m, 1H); 7.62-7.59 (m, 1H

58.12-

**Fig. S24.** Mass spectrum of Naphthalen-2-yl(phenyl) selenide

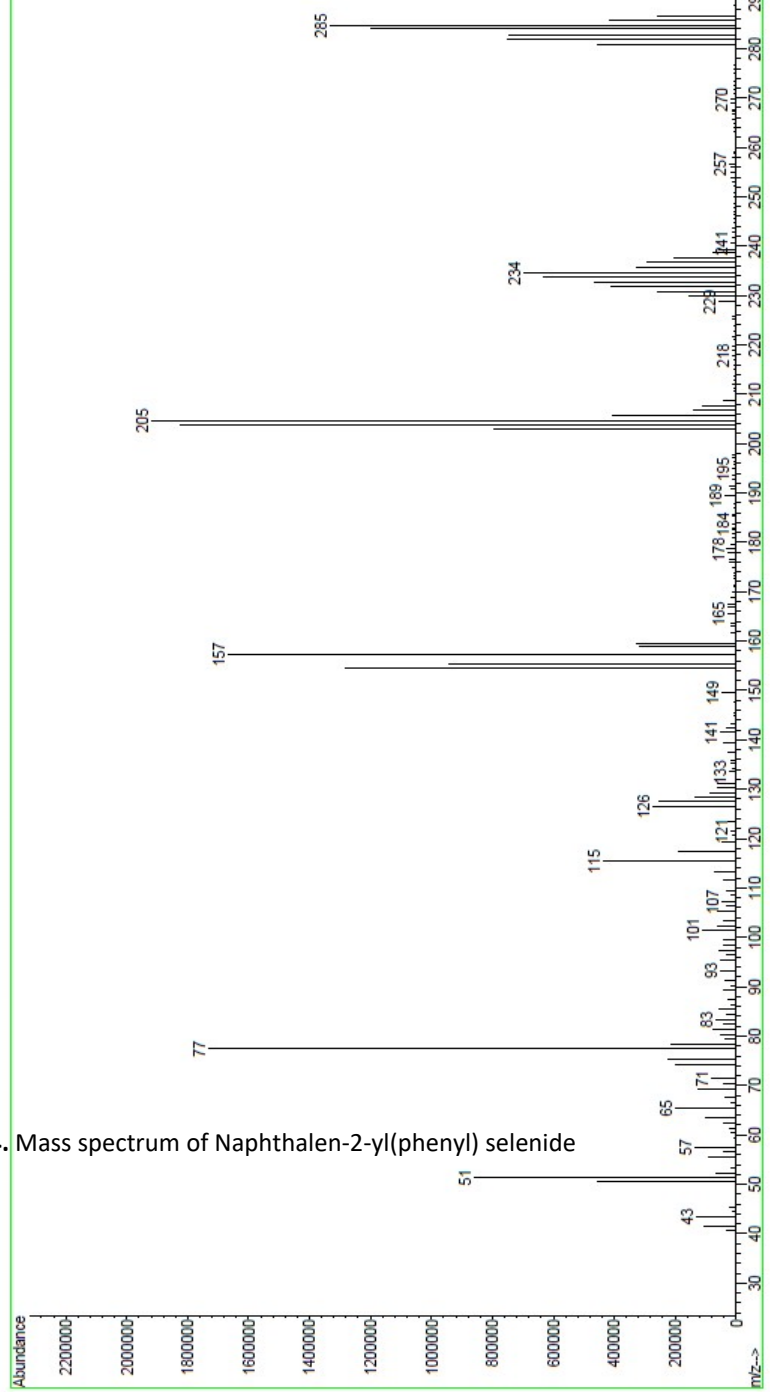

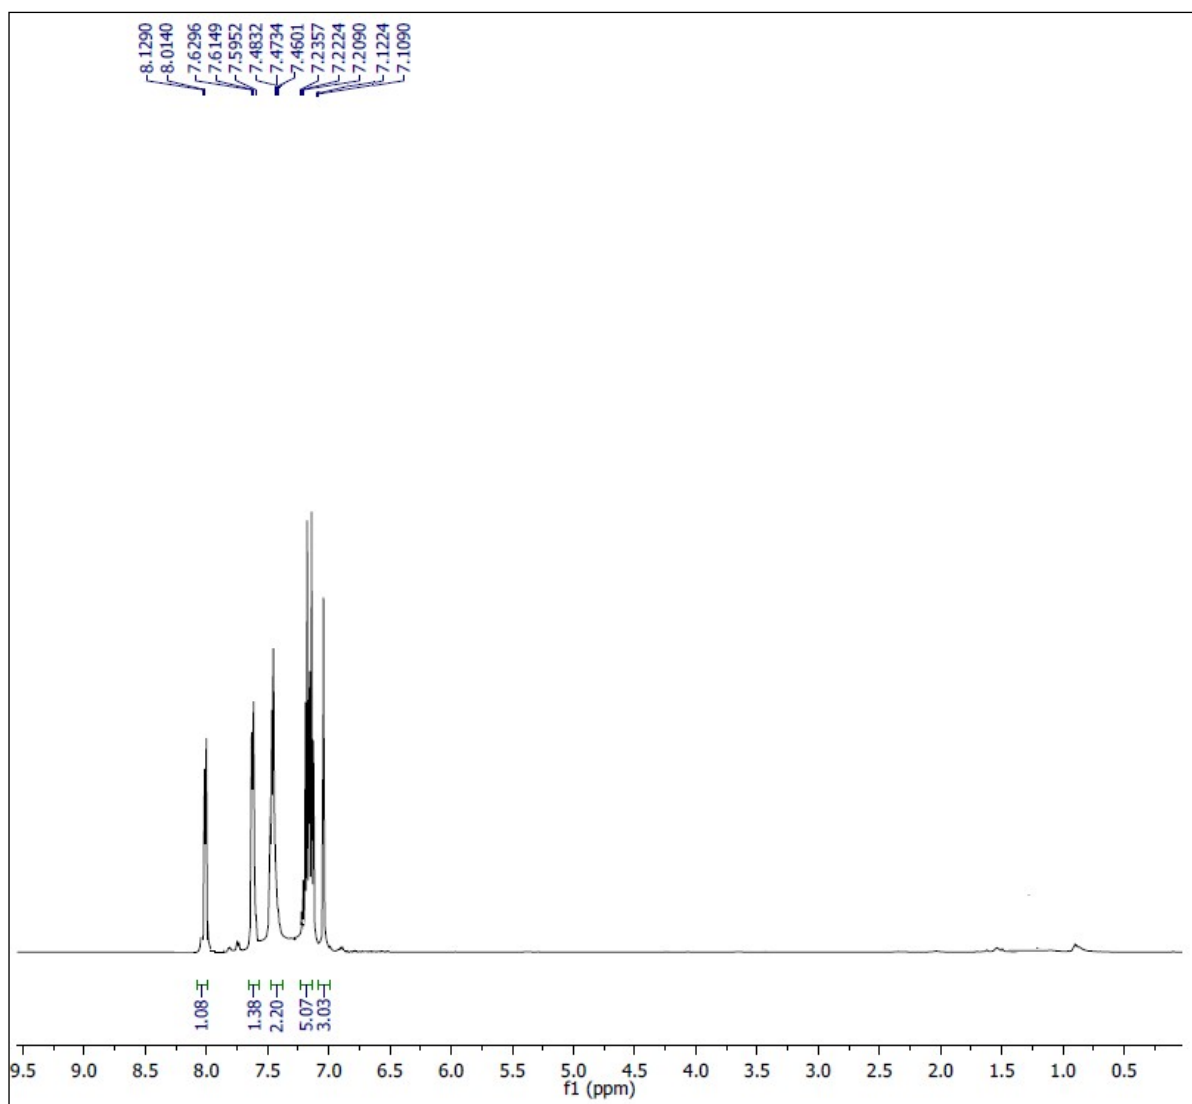

Fig. S25.  $^1\text{H}$  NMR spectrum of Naphthalen-2-yl(phenyl) selenide

**3,5-Bis(trifluoromethyl)phenyl phenyl selenide [5]:** Colorless oil: MS: 370 m/z;  $^1\text{H}$  NMR ( $\text{CDCl}_3$ , 500 MHz):  $\delta$  8.03 (s, 2H); 7.73 (s, 1H); 7.30-7.29 (m, 2H); 7.28-7.25 (m, 3H).



**Fig. S26.** Mass spectrum of 3,5-Bis(trifluoromethyl)phenyl phenyl selenide

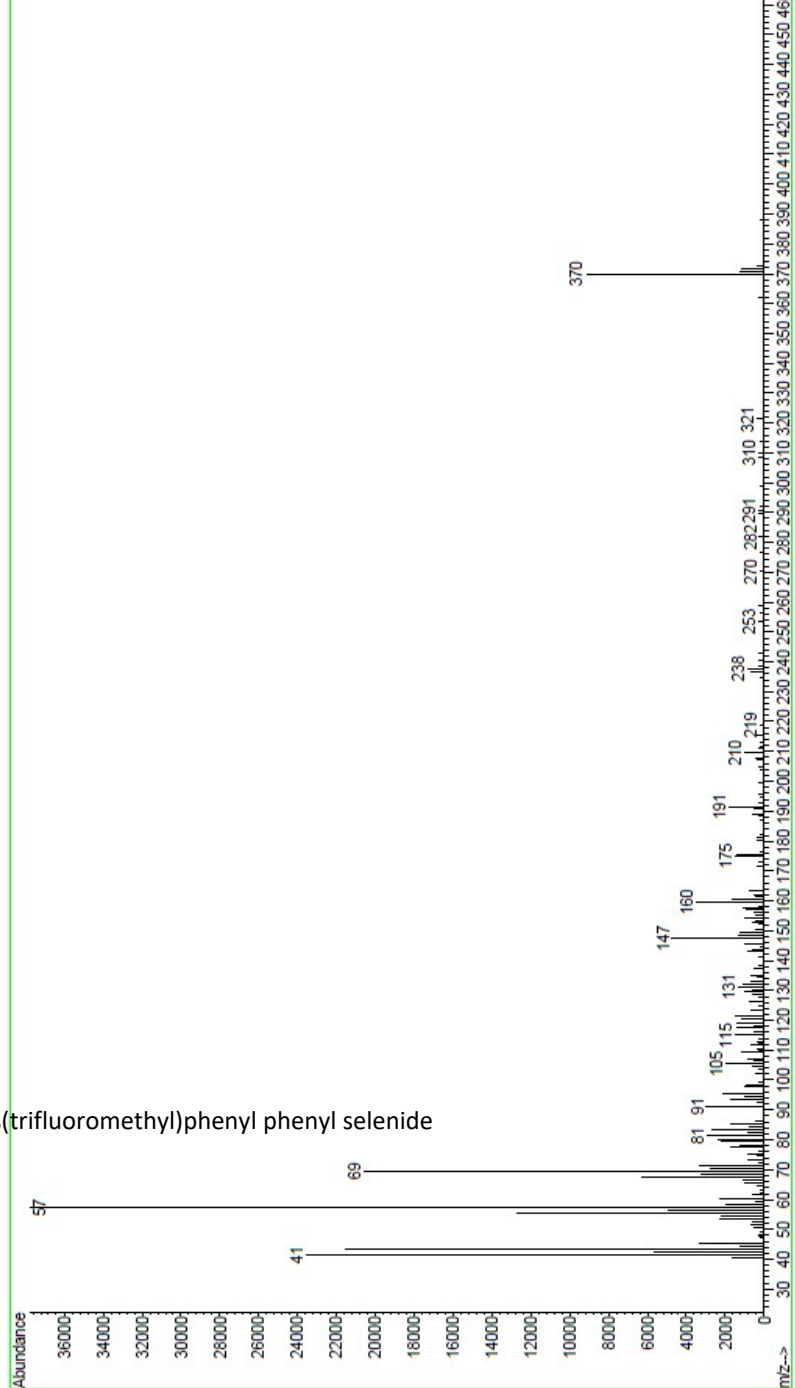

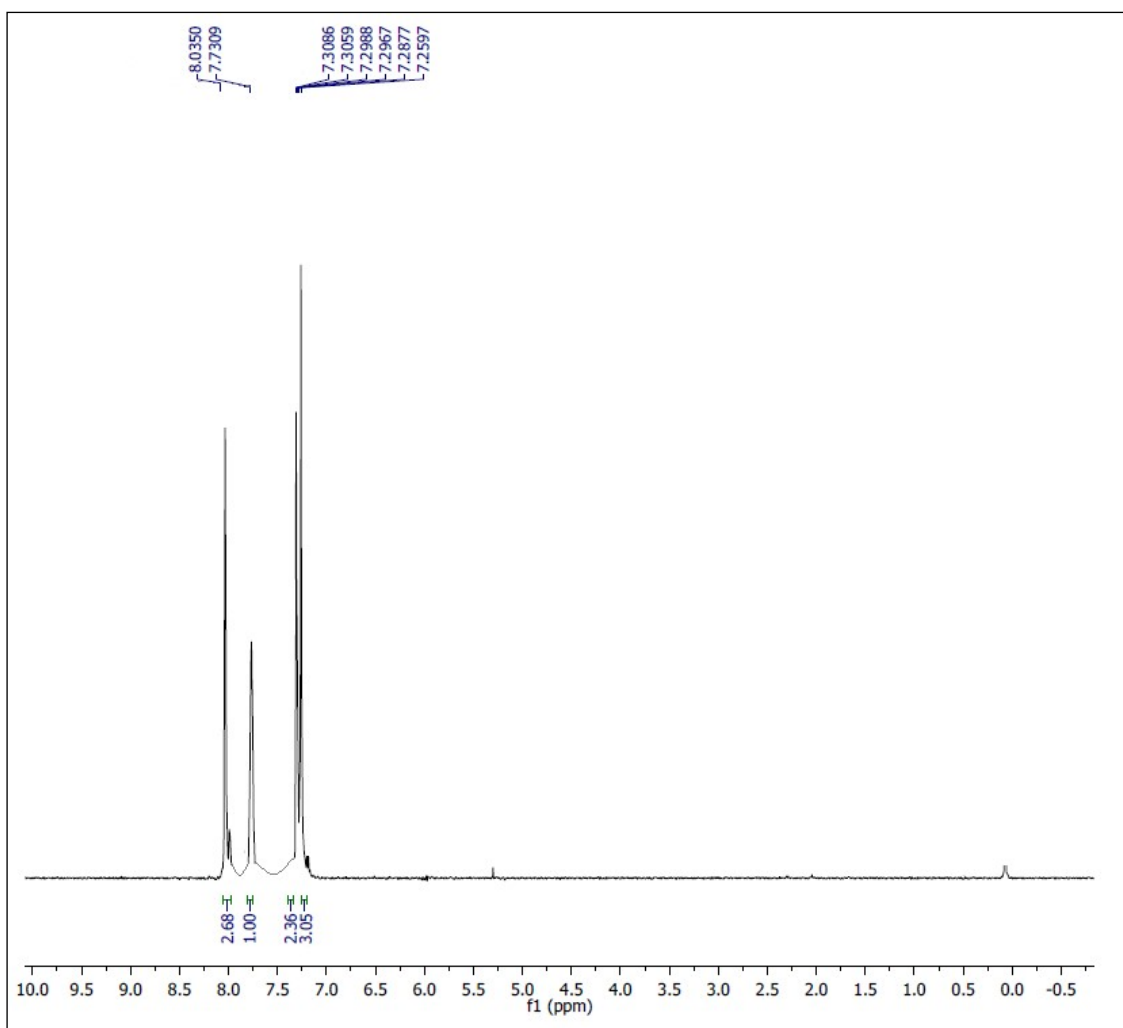

**Fig. S27.**  $^1\text{H}$  NMR spectrum of 3,5-Bis(trifluoromethyl)phenyl phenyl selenide

Naphthalen-1-yl(phenyl) s  
(m, 1H); 7.62-7.61 (m, 2H); 7.45

7.74

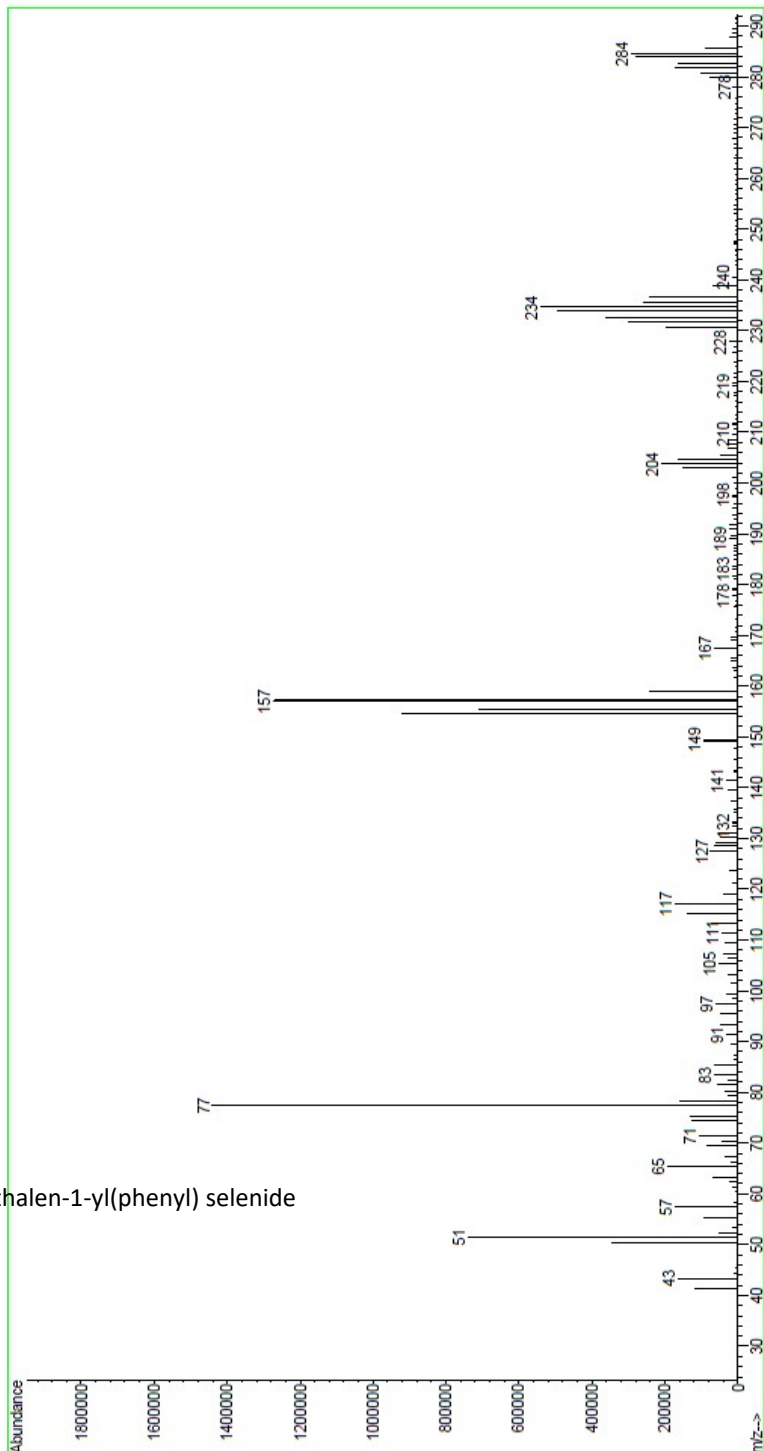

Fig. S28. Mass spectrum of Naphthalen-1-yl(phenyl) selenide

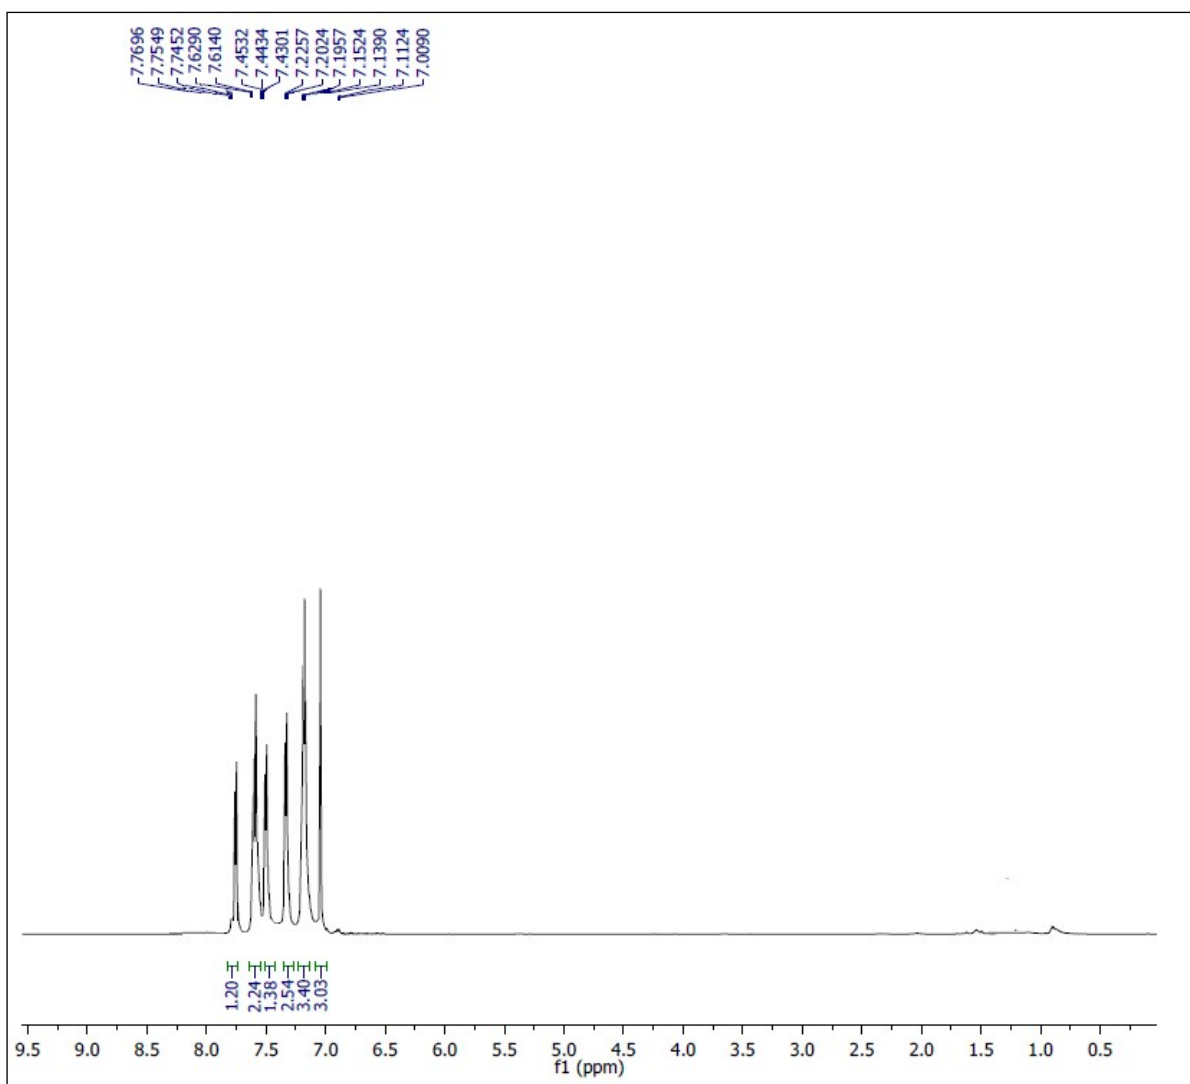

**Fig. S29.**  $^1\text{H}$  NMR spectrum of Naphthalen-1-yl(phenyl) selenide

**4-Flouorophenyl-phen**  
2H), 7.28-7.22 (m, 6H), 6.9

59(m,

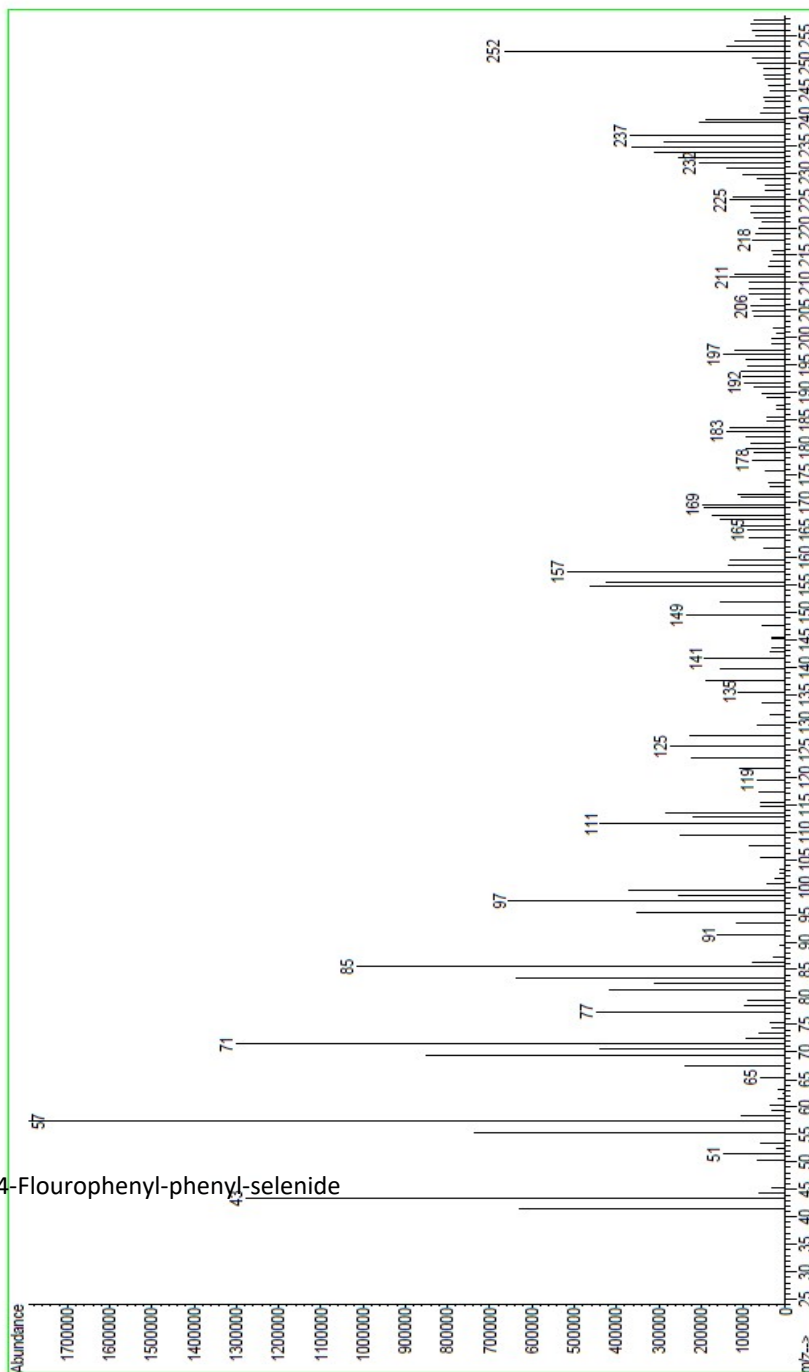

**Fig. S30.** Mass spectrum of 4-Fluorophenyl-phenyl-selenide

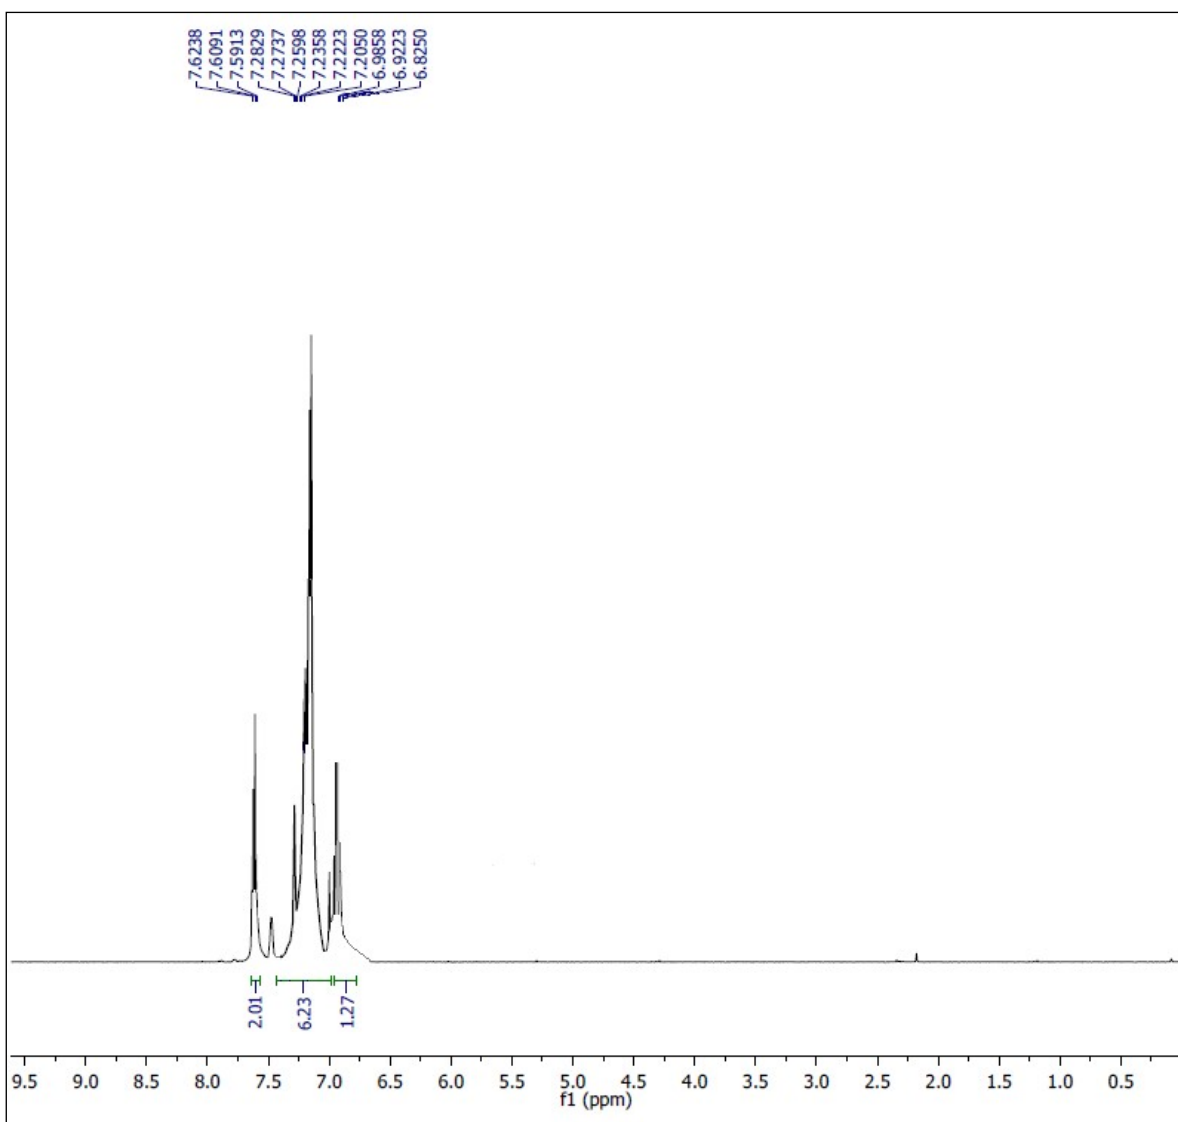

Fig. S31.  $^1\text{H}$  NMR spectrum of 4-Fluorophenyl-phenyl-selenide

**4-Nitrophenyl-phenyl-se**

MHz):  $\delta$  8.05 (dd, J = 10, 2 Hz,

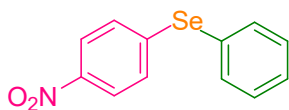

DCI<sub>3</sub>, 500

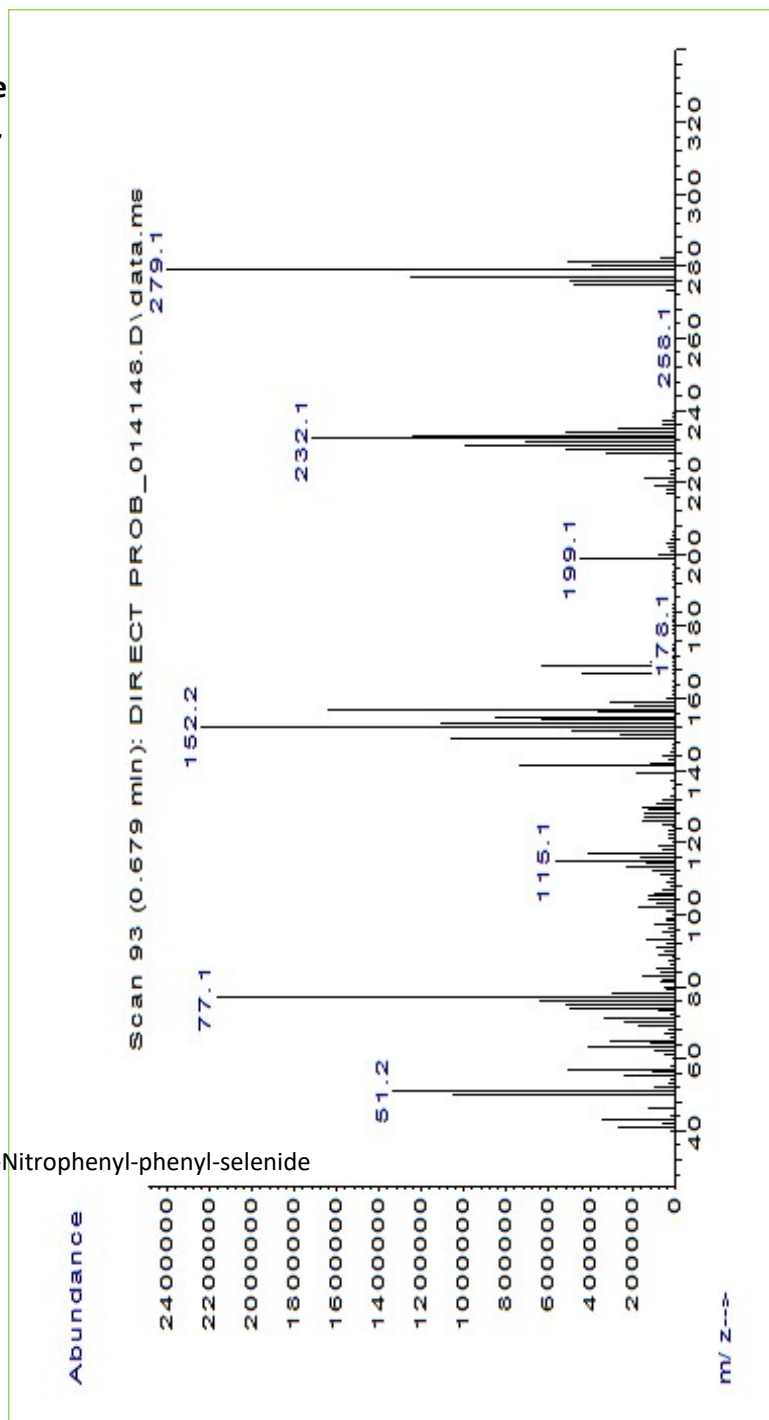

Fig. S32. Mass spectrum of 4-Nitrophenyl-phenyl-selenide

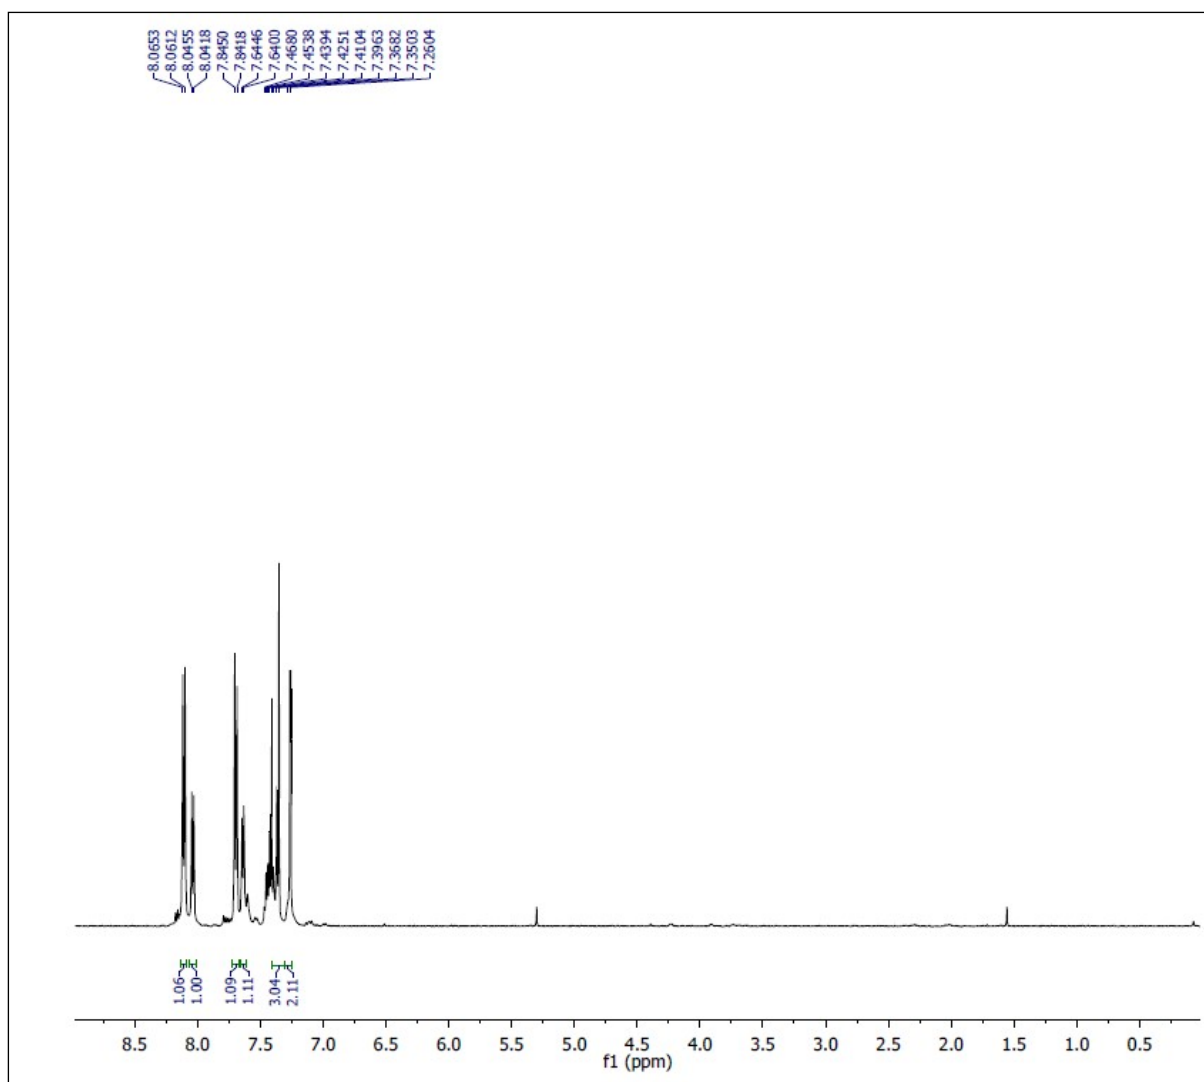

Fig. S33. <sup>1</sup>H NMR spectrum of 4-Nitrophenyl-phenyl-selenide



**2-Pyridine-phenyl-seler**  
1H); 7.74-7.70 (m, 2H); 7.40

l2 (d,  $J = 5$  Hz,

**Fig. S34.** Mass spectrum of 2-Pyridine-phenyl-selenide

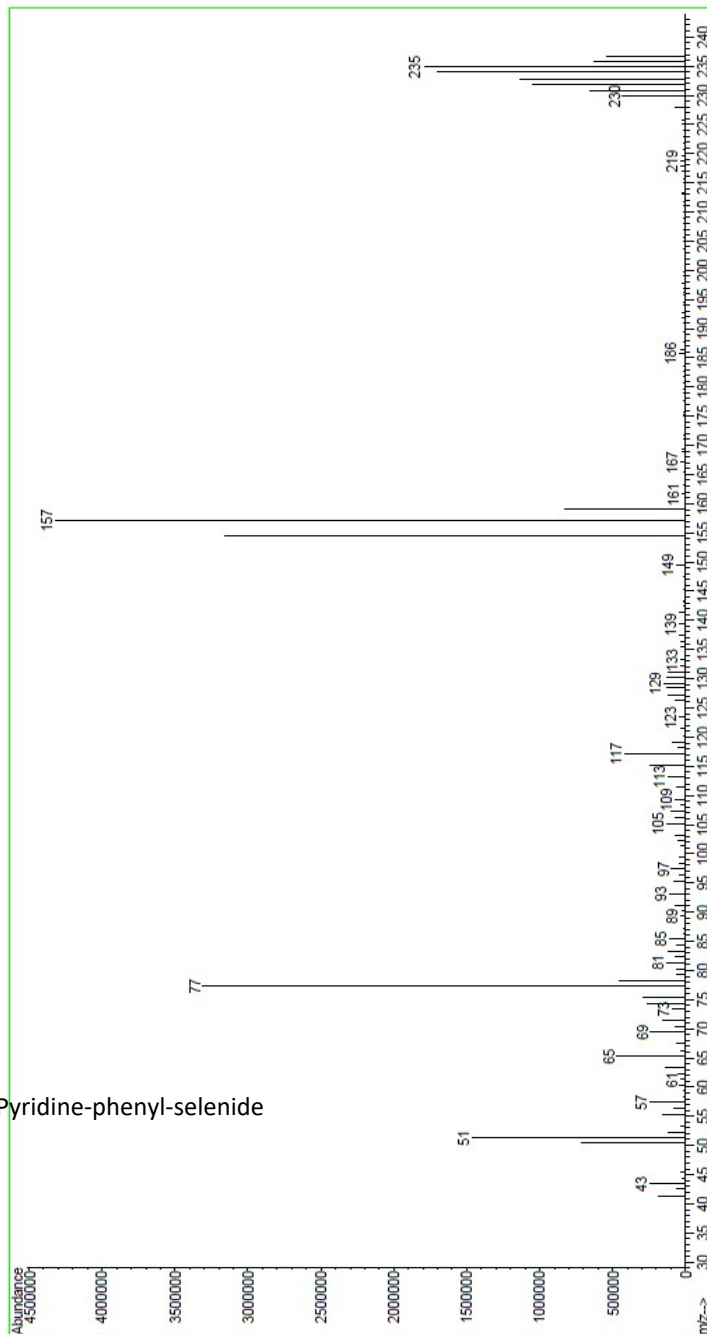

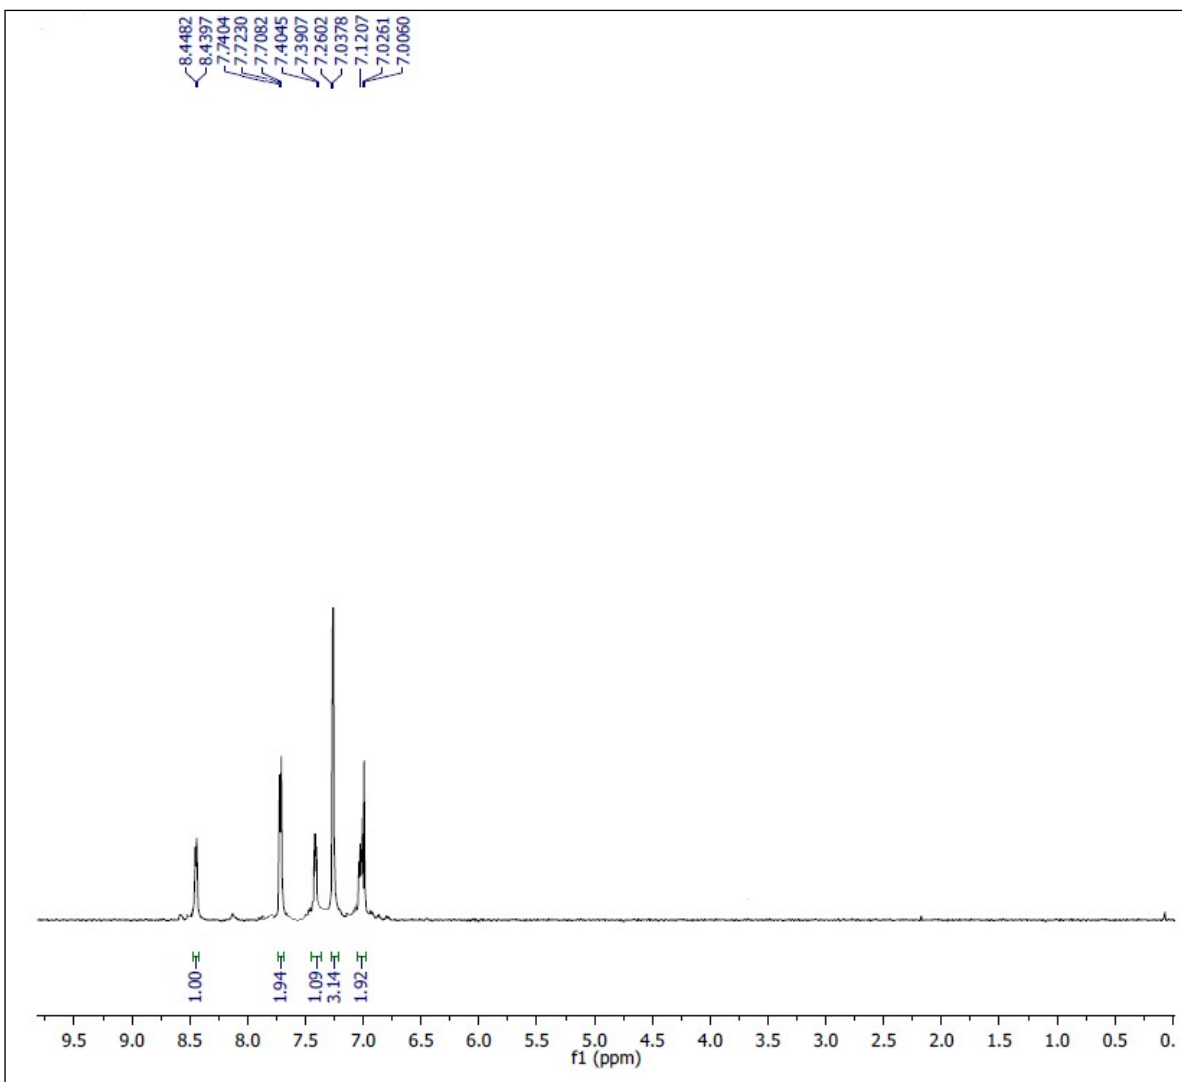

**Fig. S35.** <sup>1</sup>H NMR spectrum of 2-Pyridine-phenyl-selenide

#### IV. References

1. V.G. Ricordi, C.S. Freitas, G. Perin, E.J. Lenardao, R.G. Jacob, L. Savegnago, D. Alves, *Green Chem.*, 2012, **14**, 1030.
2. M. Li, J.M. Hoover, *Chem. Commun.*, 2016, **52**, 8733.
3. S. Saba, J. Rafique, A.L. Braga, *Adv. Synth. Catal.*, 2015, **357**, 1446.
4. T. Chatterjee, B.C. Ranu, *J. Org. Chem.*, 2013, **78**, 7145.
5. J. H. Cheng, C. L. Yi, T. J. Liu, C. F. Lee, *Chem. Commun.*, 2012, **48**, 8440.
6. A. Dandapat, C. Korupalli, D.J.C. Prasad, R. Singh, G. Sekar, *Synthesis*, 2011, 2297.
7. S.N. Murthy, B. Madhav, V.P. Reddy, Y.V.D. Nageswar, *Eur. J. Org. Chem.*, 2009, 5902.
8. M.J. Bu, G.P. Lu, C. Cai, *Synlett*, 2015, 1841.
